# Modulating the left inferior frontal cortex by task domain, cognitive challenge and tDCS

*Davide Nardo<sup>1,2</sup>, Katerina Pappa<sup>1,3</sup>, John Duncan<sup>2,4</sup>, Peter Zeidman<sup>5</sup>, Martina F. Callaghan<sup>5</sup>, Alexander Leff<sup>1,5,6</sup>, Jennifer Crinion<sup>1</sup>*

<sup>1</sup>Institute of Cognitive Neuroscience, University College London, London, UK; <sup>2</sup>MRC Cognition and Brain Sciences Unit, University of Cambridge, Cambridge, UK; <sup>3</sup>Institute of Health & Wellbeing, University of Glasgow, Glasgow, UK;

<sup>4</sup>Department of Experimental Psychology, University of Oxford, Oxford, UK; <sup>5</sup>Wellcome Centre for Human Neuroimaging, University College London, London, UK; <sup>6</sup>Department of Brain Repair and Rehabilitation, Institute of Neurology, University College London, London, UK.

## ABSTRACT

The left inferior frontal cortex (LIFC) is a key region for spoken language processing, but its neurocognitive architecture remains controversial. Here we assess the domain-general vs. domain-specificity of the LIFC from behavioural, functional neuroimaging and neuromodulation data. Using concurrent fMRI and transcranial direct current stimulation (tDCS) delivered to the LIFC, we investigated how brain activity and behavioural performance are modulated by task domain (naming vs. non-naming), cognitive challenge (low vs. high), and tDCS (anodal vs. sham). The data revealed: (1) co-existence of neural signatures both common and distinct across tasks within the LIFC; (2) domain-preferential effects of task (naming); (3) significant tDCS modulations of activity in a LIFC sub-region selectively during high-challenge naming. The presence of both domain-specific and domain-general signals, and the existence of a gradient of activation where naming relied more on sub-regions within the LIFC, may help reconcile both perspectives on spoken language processing.

**Keywords:** left inferior frontal cortex, Broca's area, speech production, cognitive challenge, tDCS

## 30 INTRODUCTION

31 Since Paul Broca's seminal discovery of the localisation of expressive aphasia in the damaged  
32 brain more than 150 years ago, the left inferior frontal cortex (LIFC) has been considered a  
33 key brain region for speech function. In the last three decades, the advent of functional  
34 imaging has provided plenty of evidence supporting the relationship between speech  
35 production and activity in the LIFC in healthy subjects (e.g., for a review see Price, 2012), also  
36 showing that the LIFC is implicated in other key aspects of language processing, such as  
37 comprehension, syntax, and semantics (Dapretto & Bookheimer, 1999; Noppeney et al., 2004;  
38 Tyler et al., 2011; Rodd et al., 2015).

39 However, critically, functional imaging research has shown that regions within the LIFC also  
40 contribute to an executive function network activated by many non-linguistic, cognitively  
41 challenging tasks (e.g., see Bartley et al., 2018; Camilleri et al., 2018). Whether language, as a  
42 mental process is domain-general (i.e., shares a single underlying resource across many  
43 cognitive functions or tasks) or domain-specific (i.e., relies on independent components) is a  
44 broad question (cf. Petkov & Marslen-Wilson, 2018) that is pertinent to many areas of  
45 psychology. In cognitive neuroscience, whether the LIFC might be part of a network  
46 supporting domain-general (i.e., multiple cognitively challenging tasks), rather than domain-  
47 specific (i.e., mainly linguistic-related tasks), is hotly debated (Duncan, 2010; Fedorenko et al.,  
48 2012; Fedorenko & Thompson-Schill, 2014; Geranmayeh et al., 2014). In this paper, we focus  
49 on the issue of domain-specificity vs. domain-generality of neurocognitive substrates  
50 supporting spoken language in the LIFC.

51 Initial evidence of a domain-general role for the LIFC comes from a series of functional  
52 imaging studies investigating the issue of specificity vs. generality within the language  
53 domain, i.e. using verbal stimulus material. These studies tried to disentangle whether the  
54 LIFC (or any sub-region within it) is associated with specific aspects of linguistic processing  
55 (e.g., phonology, syntax, semantics), or rather if its activity is dynamically associated with  
56 cognitive demand. For instance, activity in the LIFC may not be associated with semantic  
57 retrieval *per se*, but rather with general cognitive selection demands, such as when faced with  
58 many competing alternative responses (e.g., when naming a picture of a dog you choose to  
59 say either /animal/, /dog/, /pet/, /Dalmatian/, /Fido/etc.; cf. Thompson-Schill et al., 1997).  
60 Other studies suggest that activity in this region may be related to increased cognitive effort

61 due to conflict and/or ambiguity resolution (Vitello et al., 2014), rather than to the specific  
62 linguistic tasks at hand (i.e., whether semantic, phonological, or syntactic; see Snyder et al.,  
63 2007; January et al., 2009; Rodd et al., 2010; Hsu et al., 2017; Novick et al., 2009, for evidence  
64 in brain-damaged patients; but see Santi & Grodzinsky, 2007 for conflicting results).

65 A subset of bilateral frontal and parietal cortices have been identified as involved in different  
66 types of cognitively challenging tasks (cf. Duncan & Owen, 2000; Duncan, 2010, 2013). This  
67 set of brain areas has collectively been labelled the ‘Multiple-Demand System’ (MDS), and  
68 includes the cortex surrounding the posterior inferior frontal sulcus (LIFC), anterior insular  
69 cortex, premotor cortex, dorsolateral prefrontal cortex, anterior cingulate cortex, pre-  
70 supplementary motor area, and the cortex surrounding the intraparietal sulcus. A defining  
71 functional characteristic of this network is its consistent activation/engagement during  
72 cognitive or executive control tasks. More specifically, these regions are sensitive to cognitive  
73 demands, namely the level of difficulty across many different domains, such as perception,  
74 language, memory, response selection, response inhibition, problem solving, task novelty and  
75 so on, typically showing increased activity in more challenging conditions (Fedorenko et al.,  
76 2013; Woolgar et al., 2013).

77 Building on this approach, in a recent paper Fedorenko and colleagues have investigated  
78 whether activity in the LIFC is language-specific or domain-general in terms of the functional  
79 properties exhibited by the MDS (Fedorenko et al., 2012). Using a linguistic (sentence reading)  
80 vs. a non-linguistic task (non-words reading) they identified sub-regions within the LIFC which  
81 were either sensitive or insensitive to linguistic processing. Subsequently, two sub-regions  
82 were investigated during the performance of six different cognitive tasks (arithmetic addition,  
83 spatial/verbal working memory, Stroop task, and two versions of the multisource interference  
84 task), each of which included an ‘easier’ and a ‘harder’ condition. Their results showed that  
85 Broca’s area contained two functionally distinct sub-regions lying side by side. A first sub-  
86 region (located in the triangular part of the LIFC), was highly responsive to the processing of  
87 linguistic material, but showed little or no response to cognitive tasks and/or the degree of  
88 cognitive challenge. A second sub-region (surrounding the first one), showed instead little or  
89 no response to linguistic processing, but was extremely sensitive to cognitive tasks  
90 (irrespective of the stimulus material used), and more active in harder rather than easier

91 conditions. The authors concluded that Broca's area is not a homogenous functional unit.  
92 Instead, within Broca's area there are both language-specific and domain-general units.

93 Related studies from the same group have reported consistent results, showing that other  
94 nodes within the language network (e.g., superior temporal and inferior parietal cortices) do  
95 not show any sensitivity to cognitive demand/difficulty (Fedorenko et al., 2011), whereas  
96 nodes within the MDS do exhibit such a sensitivity (Fedorenko et al., 2013). Furthermore, the  
97 two networks (language areas vs. MDS) show a dissociation in functional connectivity (i.e.,  
98 internal coherence) and a reciprocal lack of correlation (Blank et al., 2014). These studies have  
99 provided us with very valuable contributions to understand how the LIFC and MDS work.  
100 However, like all studies, they also have a number of limitations. First, the cognitive tasks  
101 adopted (as well as the harder and easier conditions) were not designed to be directly  
102 comparable to one another (as acknowledged by Fedorenko et al., 2013). Second, cognitive  
103 challenge in the linguistic task was not manipulated, so it is unclear how activity in the  
104 triangular part of the LIFC is modulated by linguistic challenge. Third, they made use of a non-  
105 standard, subject-based analytical approach (Fedorenko et al., 2010). Although this approach  
106 has the benefit of taking into account individual differences in functional anatomy, it makes  
107 it difficult to draw inferences at the population level.

108 To address these limitations, we designed a double-blind randomised crossover functional  
109 neuroimaging (fMRI) study to investigate which parts of the LIFC are engaged in a domain-  
110 specific manner, and which ones are engaged in a domain-general manner, i.e. to identify  
111 sub-regions within the LIFC whose activity is modulated according to a clear functional rule  
112 (i.e., domain-specificity vs. -generality). We developed two tasks: one linguistic (picture  
113 Naming) and one non-linguistic (size Judgment) with two difficulty levels (High vs. Low)  
114 carefully matched in terms of: stimulus material, experimental conditions, output demand,  
115 and behavioural performance (see below for details).

116 This enabled us to first delineate the neural correlates associated with the specific cognitive  
117 processes central to each task, and ask whether they recruit the LIFC to a similar or differential  
118 degree (i.e., testing domain-specificity vs. domain-generality). According to the  
119 aforementioned theoretical standpoints, for domain-specific sub-regions within the LIFC (i.e.,  
120 hubs of the 'Language Network'), which are functionally specialised (i.e., 'modular') for  
121 linguistic processing (e.g., Fedorenko et al., 2012), we should predict: i) little-to-no

122 overlapping activation between the two tasks; and/or ii) different activation patterns for the  
123 two tasks in sub-regions modulated by different functional rules (e.g., greater BOLD response  
124 for naming vs. judgment, and vice-versa). Conversely, domain-general sub-regions should  
125 support both tasks performance with increased recruitment reflecting increasing cognitive  
126 challenge irrespective of the nature of the stimuli at hand (e.g., Duncan, 2010). In such sub-  
127 regions we should predict (at least partial) overlapping activation between the two tasks,  
128 and/or similar activation patterns (i.e., BOLD response profiles) across both tasks.

129 Second, we could cleanly isolate the neural activation patterns associated with cognitive  
130 demand (namely difficulty), across both tasks while controlling for stimulus type. This allowed  
131 us to investigate whether, and where, cognitive demand (High-challenge) increases activity in  
132 the LIFC to a greater extent than Low-challenge (i.e., testing domain-generality). For domain-  
133 specific sub-regions, we should predict either: i) different patterns of sensitivity to cognitive  
134 challenge modulations for the two tasks (e.g., increased activity for High->Low-challenge for  
135 Naming and Judgment in different sub-regions); or ii) no increased BOLD response in the  
136 Judgment task. In domain-general sub-regions, we should predict comparable response  
137 patterns to cognitive challenge modulations across both tasks (e.g., increased activity for  
138 High->Low-challenge in both tasks in the same sub-regions).

139 Additionally, we delivered two types of transcranial direct current stimulation (tDCS) to the  
140 LIFC concurrently with the fMRI study (Anodal vs. Sham). In this way, we were able to  
141 investigate whether and how neuromodulation of the LIFC affects on-line brain and  
142 behavioural performance for specific cognitive processes (linguistic vs. non-linguistic) for each  
143 task, and general cognitive demand, namely difficulty (Low vs. High) across both tasks (i.e.,  
144 testing the contribution of the LIFC to specificity/generality). Anodal tDCS delivered to the  
145 LIFC has been shown to reduce both reaction times (RTs) and BOLD response within the LIFC  
146 during a spoken naming fMRI task (Holland et al., 2011). This was interpreted as brain and  
147 behavioural priming by tDCS. The electrode covers a relatively large area and is supposed to  
148 stimulate both domain-specific and domain-general sub-regions. However, from a domain-  
149 specific perspective, we should predict neuromodulation to result in different behavioural  
150 and brain effects across tasks. For example, facilitation of the linguistic (but not non-linguistic)  
151 task, or behavioural effects in both tasks but different underlying neural activation patterns  
152 in different sub-regions of the LIFC for each task (i.e., different neural interactions).

153 Conversely, from a domain-general perspective, we should predict tDCS to result in significant  
154 behavioural and brain effects across both tasks and within the same LIFC sub-region(s). For  
155 example, anodal tDCS facilitating behavioural responses (reduced RTs) across both tasks with  
156 a corresponding modulation of neural activation within the same hub.

157 Viewed broadly, our study aimed – for the first time – to compare the neurocognitive  
158 architecture of spoken language processing across domains and tasks by matching task and  
159 stimulus characteristics. Functional neuroimaging enabled us to characterise, within subjects,  
160 the common and dissociable neural correlates underlying multiple levels of two demanding  
161 tasks (one requiring spoken language). While neuromodulation of the LIFC would allow us to  
162 directly test whether its contribution to spoken language processing is domain-specific (i.e.,  
163 language preferential) relying on independent components (LIFC sub-regions), domain-  
164 general (i.e., shared resources across both our cognitively challenging tasks), or perhaps a  
165 more nuanced picture of both.

166

## 167 **METHODS**

### 168 *Participants*

169 This study is part of a larger research project about anomia rehabilitation in people who  
170 suffered left hemisphere stroke. In this framework, we recruited a cohort of healthy controls  
171 who will be later compared with aphasic stroke patients. Here, we report the data of 17  
172 healthy right-handed native English speakers (6 M, mean age: 69±9), who took part in the  
173 study. All had normal hearing, normal or corrected-to-normal visual acuity, no history of  
174 neurological or psychiatric disease, and no contraindications to MR scanning. All participants  
175 gave written informed consent to participate in the study, which was approved by the Central  
176 London Research Ethics Committee and conducted in accordance with the ethical principles  
177 stated by the Declaration of Helsinki.

178

### 179 *Stimuli and experimental conditions*

180 Each experimental trial consisted of the simultaneous presentation of an auditory cue  
181 associated with the picture of a concrete object (cf. Figure 1A). A list of 480 target words was  
182 drawn from the IPNP database (n=220), and from the MRC Psycholinguistic Database (n=260;

183 <http://websites.psychology.uwa.edu.au/school/MRCDatabase/mrc2.html>; Coltheart, 1981).  
184 All object names were monosyllabic words and consonant-vowel-consonant (CVC) in terms of  
185 phonological structure. Auditory cues consisted of either the initial phoneme of a target word,  
186 or a noise control. To generate the auditory cues, each target word was digitally recorded (at  
187 44.1 kHz) from a male native English speaker in a soundproof room, then cropped at the offset  
188 of the vowel to form the initial phoneme cue (e.g., /bɒ/ for 'box'). Noise control cues were  
189 generated by noise vocoding the initial phoneme cues. This was performed utilizing the  
190 technique described by Shannon et al. (1995), using custom Matlab scripts (cf. Evans & Davis,  
191 2015). Accordingly, the frequency range of 30-6000 Hz was divided into a single channel. The  
192 amplitude envelope was extracted by half-wave rectifying the signal and applying a low-pass  
193 filter with a cut-off of 30 Hz, to remove pitch synchronous oscillations. This envelope was used  
194 to amplitude modulate band-pass filtered white noise in the same frequency range as the  
195 source. This generated an acoustic signal with a temporal and spectral profile similar to the  
196 original speech, but not intelligible. Initial phoneme and noise control cues were matched for  
197 auditory duration. Visual stimuli consisted of 480 black and white line drawings of concrete  
198 objects, partly derived from the International Picture Naming Project (IPNP; Szekely et al.,  
199 2004; <http://crl.ucsd.edu/experiments/ipnp/index.html>), and the remainder found on the  
200 internet (with similar style/figurative features as the IPNP items).

201 Our experimental conditions were designed in order to manipulate cognitive challenge  
202 orthogonally in the auditory and visual modalities at the same time. Aurally, each picture was  
203 presented simultaneously with an auditory cue in two experimental conditions: i) Low-  
204 challenge (initial phoneme); or ii) High-challenge (noise-vocoded control). Visually, pictures  
205 were presented with a variable amount of visual noise overlapped (i.e., masking elements  
206 made up of black squiggly lines and/or geometrical shapes), in two experimental conditions:  
207 i) Low-challenge (5 masking elements); or ii) High-challenge (15 masking elements; cf. Figure  
208 1A). Both manipulations had the effect of making an object more ambiguous, and therefore  
209 increasing cognitive challenge to identify an object identity. Items were assigned to the  
210 various experimental conditions in such a way that average psycholinguistic features (e.g.,  
211 frequency, concreteness, imageability, initial phoneme, etc.) were balanced across  
212 conditions, and assignment was counterbalanced across subjects and sessions (see below).



214 *Tasks and procedure*

215 Subjects performed two fMRI-tDCS sessions (either Anodal or Sham tDCS on each occasion,  
216 see below) one week apart (cf. Figure 1B), with the order counterbalanced across subjects. In  
217 each session, subjects were required to perform two tasks in different functional runs: i) a  
218 picture Naming task; and ii) a size Judgment task. Subjects performed two runs of Naming and  
219 two runs of Judgment per session, and the sequence of tasks in the four functional runs was  
220 counterbalanced both between subjects and sessions. In the Naming task, subjects had to  
221 name each target picture as quickly and as accurately as possible. In the Judgment task, they  
222 had to determine (yes/no spoken responses) whether the size of each object depicted would  
223 fit inside a microwave oven. This type of decision was required because – contrary to decisions  
224 such as living vs. non-living, natural vs. man-made, or indoor vs. outdoor – the answer is not  
225 already available in semantic memory, i.e. it requires new item-specific processing in real  
226 time. In terms of cognitive processes involved, both tasks required object identification,  
227 decision making, and a vocal response. However, while the Naming task necessarily relies  
228 upon lexical retrieval, this is not the case with the Judgment task.

229 Each visual stimulus was displayed for 2500 ms, preceded by a 1000 ms alerting fixation cross  
230 and followed by a blank screen for 350 ms (see Figure 1C). Auditory cues were presented  
231 simultaneously with each picture (Stimulus-Onset-Asynchrony=0 ms). Trials were presented  
232 in mini-blocks of six stimuli (belonging to different conditions), separated by fixation-only rest  
233 periods of 7700 ms in order to optimize the timing of the experiment for the BOLD response  
234 (Henson, 2006). To vary the spatiotemporal synchrony between the trial structure and the  
235 image acquisition the inter-trial interval was set to 3850 ms to jitter the onset of each trial  
236 across acquired brain volumes.

237 Overt spoken responses were recorded online using a dual-channel, noise-cancelling fibre  
238 optical microphone system (FOMRI III; <http://www.optoacoustics.com>), and reviewed offline  
239 to determine trial-specific reaction times (RTs) for each subject. Auditory cues were delivered  
240 via MR-compatible headphones (MR Confon, Magdeburg, Germany; [www.mr-confon.de](http://www.mr-confon.de)).  
241 The order of experimental conditions was pseudo-randomized within a functional run (i.e.,  
242 avoiding more than three trials of the same condition in a row). On each session, all subjects  
243 underwent a short training period, before entering the MR scanner, to become familiar with



244 the tasks and to practice how to speak in a soft voice to minimise motion in the scanner.  
245 Stimuli used during the training were not used during the fMRI session.

246

247 *Transcranial direct current stimulation (tDCS)*

248 tDCS was delivered during the fMRI experiment by using an MR-compatible stimulation  
249 system (neuroConn; [https://www.neurocaregroup.com/dc\\_stimulator\\_mr.html](https://www.neurocaregroup.com/dc_stimulator_mr.html)) via a pair of  
250 MR-compatible leads and rectangular rubber electrodes (5x7 cm), allowing for a current  
251 density of 0.057 mA/cm<sup>2</sup> (cf. Holland et al., 2011). For all participants, the anode was placed  
252 over the LIFC (equivalent to position FC5 in a 10-20 EEG nomenclature; cf. Figure 1D), and the  
253 cathode placed over the contralateral frontopolar cortex (FP2). Both electrodes and the sites  
254 on the scalp where the electrodes were placed were covered with EEG conductive paste to  
255 ensure a flush and comfortable fit between the electrode surface and the scalp. Electrodes  
256 were secured to the head using 3M Coban elastic wrap bandage and placed in adherence with  
257 the manufacturer's MR safety guidelines. Care was taken in connecting the leads backward  
258 along the centre of the scanner bore to minimize the possibility of radio frequency-induced  
259 heating, and to ensure that any gradient switching-induced AC currents were well below the  
260 level that might cause stimulation. The stimulator was placed outside the Faraday cage of the  
261 scanner, and the stimulating current was fed to the participant through two stages of radio  
262 frequency filtration to prevent interference being picked up by the scanner.

263 A scanner pulse triggered the onset of the stimulation at a given slice in the acquisition  
264 sequence. The current was increased slowly during the first 15 sec to the desired stimulation  
265 threshold (2 mA), termed the ramp-up phase. A constant direct current (2 mA) was delivered  
266 for 20 min. At the end of the stimulation period, the current was decreased to 0 mA over 1  
267 sec (ramp-down). For sham stimulation, the ramp-up phase was followed by 15 sec of 2 mA  
268 stimulation, which was immediately followed by a 1 sec ramp-down phase. This active sham  
269 protocol resulted in a more efficient blinding process.

270 tDCS stimulation was conducted in a double-blind paradigm. Both stimulation and sham  
271 protocols produced sensations of comparable quality (a mild tingling, typically under the  
272 electrode placed over the contralateral orbital/frontopolar edge). Participants habituated to  
273 it quickly and reported minimal discomfort with no adverse sensations, phosphenes, or

274 analogous effects during anodal and sham tDCS stimulation runs. Four out of 17 subjects  
275 reported detecting a difference between the two sessions. However, they could not identify  
276 reliably which was the sham or the anodal stimulation session, i.e. their responses were at  
277 chance level. The position of the anode and cathode electrodes for each subject was recorded  
278 and reproduced across scanning sessions.

### A) STIMULI AND CONDITIONS

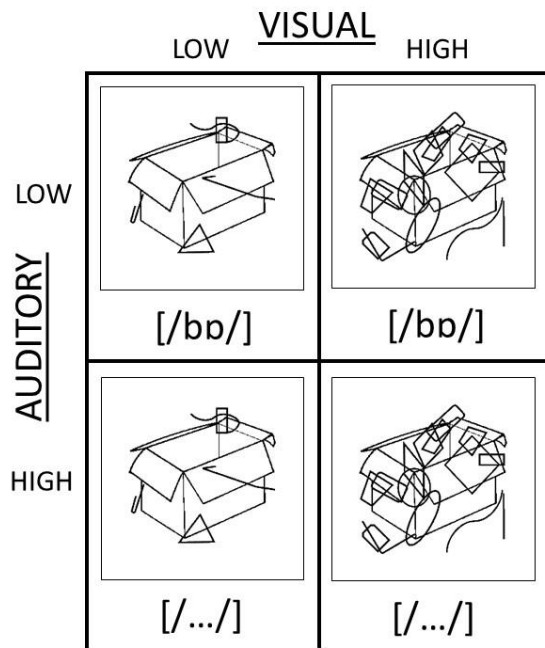

### B) EXPERIMENTAL PROTOCOL

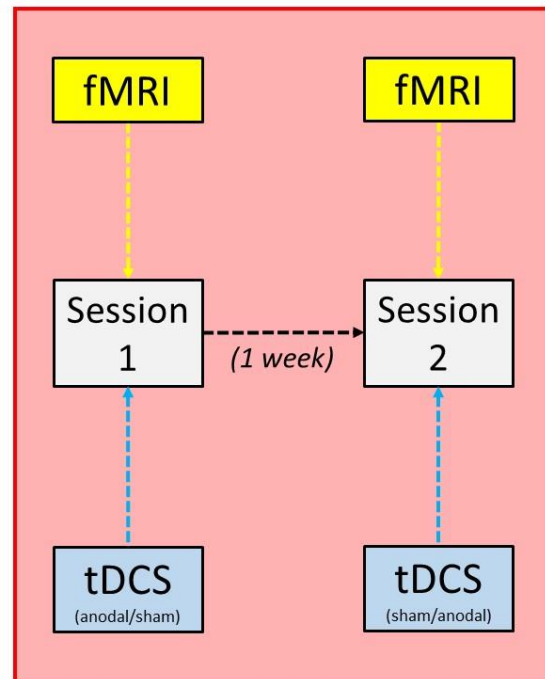

### C) EXPERIMENTAL TRIAL

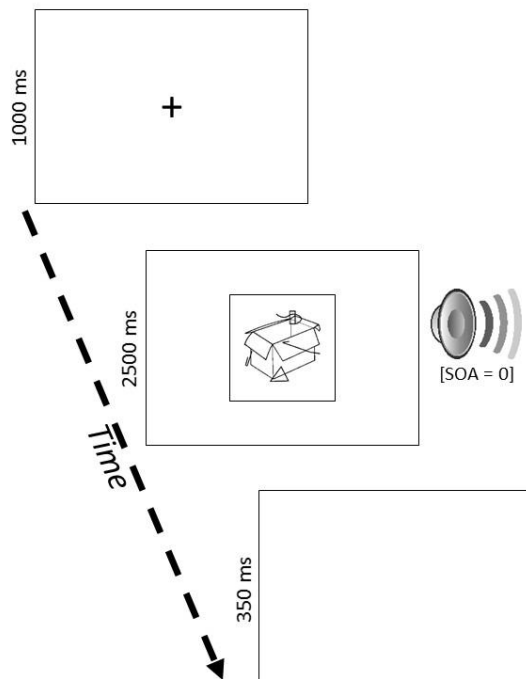

### D) tDCS MONTAGE

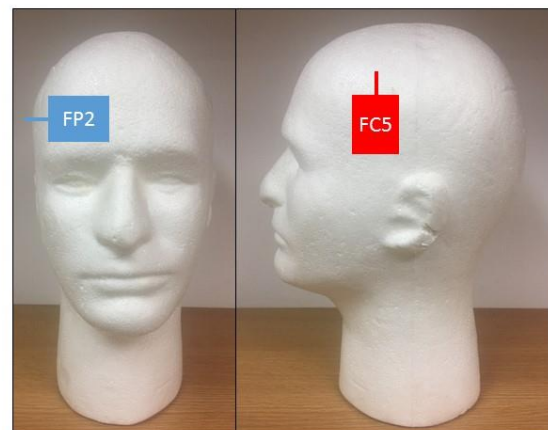

279

280 **Figure 1 – Experiment.** A) Examples of stimuli and experimental conditions. Stimuli always consisted  
281 of a picture presented concurrently with an auditory cue, and cognitive challenge was varied  
282 orthogonally in two sensory modalities (i.e., auditory and visual) at a time. Here, an example item  
283 (box) is shown in auditory Low- and High-challenge conditions (initial cue vs. noise, respectively),  
284 accompanied by visual Low- and High-challenge conditions (5 vs. 15 masking elements overlapped,  
285 respectively). B) Experimental protocol showing the two concurrent fMRI-tDCS sessions. C) Example

286 of an experimental trial. Concurrent delivery of the auditory and visual stimuli were preceded by an  
287 alerting fixation cross, and followed by a blank screen. D) tDCS montage. Example positioning of the  
288 anodal (red; FC5) and cathodal (blue; FP2) electrodes onto the head. Legend: SOA = stimulus-onset  
289 asynchrony.

290

### 291 *Imaging acquisition and analysis*

292 Whole-brain imaging was performed on a 3T Siemens TIM-Trio system (Siemens, Erlangen,  
293 Germany) at the Wellcome Centre for Human Neuroimaging. T2\*-weighted echo-planar  
294 images (EPI) with BOLD contrast were acquired using a 12-channel head coil. Imaging was  
295 optimised for BOLD sensitivity in the inferior frontal cortex (Weiskopf et al., 2006). Each EPI  
296 volume comprised 48 axial slices with sequential ascending acquisition, slice thickness=2.5  
297 mm, inter-slice gap=0.5 mm, in-plane resolution=3x3 mm<sup>2</sup>. Volumes were acquired with a  
298 TR=3360 ms, and the first six volumes of each session were discarded to ensure a steady state  
299 had been reached. In each session, a total of 195 volume images (189 volumes of interest and  
300 6 dummy scans) were acquired in each of four consecutive runs, each lasting approximately  
301 11 min. Prior to the first functional run of each scanning session, a dual gradient-echo based  
302 field map was acquired for each subject for later B0 field distortion correction of functional  
303 images. The same scanner and hardware were used for the acquisition of all images.  
304 Functional data were pre-processed and analysed using Statistical Parametric Mapping  
305 software (SPM12; [www.fil.ion.ucl.ac.uk/spm](http://www.fil.ion.ucl.ac.uk/spm)) running under Matlab 2015a (MathWorks,  
306 Natick, MA). All volumes of interest from each subject were realigned and unwarped, using  
307 session- and subject-specific voxel displacement maps (Hutton et al., 2002). The functional  
308 images were then co-registered with the structural image, spatial normalisation parameters  
309 were estimated using this latter and applied to functional images. Finally, functional data  
310 were spatially smoothed with an 8 mm FWHM isotropic Gaussian kernel to account for  
311 residual misalignment after spatial normalization and the application of Gaussian Random  
312 Field Theory for corrected statistical inference. To remove any low-frequency drifts, data  
313 were high-pass filtered using a set of discrete cosine functions with a cut-off period of 128  
314 sec.

315 Statistical analyses were first performed in a subject-specific fashion. Eight conditions per  
316 session (i.e., 2 Tasks x 2 Visual Challenge levels x 2 Auditory Challenge levels) were modelled  
317 separately as events convolved with the SPM canonical haemodynamic response function

318 (HRF). We used the presentation of the concurrent auditory cue/picture as the onset of the  
319 event. Movement realignment parameters were included as covariates of no interest. The  
320 resulting stimulus-specific parameter estimates were calculated for all brain voxels using the  
321 General Linear Model. At the second level, 16 conditions of interest were modelled (2 Tasks  
322 x 2 Visual Challenge levels x 2 Auditory Challenge levels x 2 tDCS stimulation conditions),  
323 modelling subjects as a random factor. Significance threshold for all reported results was set  
324 to  $p < 0.05$  FWE-corrected for multiple comparisons either across the whole-brain, or within *a*  
325 *priori* hypothesised regions-of-interest (ROIs) within the LIFC (i.e., when a small-volume-  
326 correction was applied, see below for details). Anatomical labelling was determined by using  
327 the Automated Anatomical Labelling atlas (AAL; Tzourio-Mazoyer et al., 2002).

328

## 329 RESULTS

### 330 *Behavioural results*

331 We performed a 2 x 2 x 2 x 2 repeated-measure ANOVA on reaction times (RTs) of all  
332 responses (cf. Supplementary Material) with **Task** (Naming, Judgment), **Auditory Challenge**  
333 (Low, High), **Visual Challenge** (Low, High), and **tDCS** (Anodal, Sham) as within-subject  
334 variables (Figure 2A). Significance threshold for reported results was set to  $p < 0.05$  throughout  
335 (see Table 1 for ANOVA results).

336

|  | <i>Effect</i>                                              | <i>F</i> | <i>DF-b</i> | <i>DF-w</i> | <i>p</i> |
|--|------------------------------------------------------------|----------|-------------|-------------|----------|
|  | <b>TASK</b>                                                | 0.002    | 1           | 16          | 0.966    |
|  | <b>AUDITORY CHALLENGE</b>                                  | 90.371   | 1           | 16          | <0.001   |
|  | <b>VISUAL CHALLENGE</b>                                    | 309.000  | 1           | 16          | <0.001   |
|  | <b>tDCS</b>                                                | 2.569    | 1           | 16          | 0.129    |
|  | <b>TASK x AUDITORY CHALLENGE</b>                           | 38.305   | 1           | 16          | <0.001   |
|  | <b>TASK x VISUAL CHALLENGE</b>                             | 5.777    | 1           | 16          | 0.029    |
|  | <b>TASK x tDCS</b>                                         | 1.719    | 1           | 16          | 0.208    |
|  | <b>AUDITORY CHALLENGE x VISUAL CHALLENGE</b>               | 0.803    | 1           | 16          | 0.383    |
|  | <b>AUDITORY CHALLENGE x tDCS</b>                           | 1.326    | 1           | 16          | 0.266    |
|  | <b>VISUAL CHALLENGE x tDCS</b>                             | 5.922    | 1           | 16          | 0.027    |
|  | <b>TASK x AUDITORY CHALLENGE x VISUAL CHALLENGE</b>        | 0.420    | 1           | 16          | 0.526    |
|  | <b>TASK x AUDITORY CHALLENGE x tDCS</b>                    | 0.007    | 1           | 16          | 0.936    |
|  | <b>TASK x VISUAL CHALLENGE x tDCS</b>                      | 10.355   | 1           | 16          | 0.005    |
|  | <b>AUDITORY CHALLENGE x VISUAL CHALLENGE x tDCS</b>        | 0.146    | 1           | 16          | 0.707    |
|  | <b>TASK x AUDITORY CHALLENGE x VISUAL CHALLENGE x tDCS</b> | 0.936    | 1           | 16          | 0.348    |

337

338 **Table 1 - Behavioural results (ANOVA on reaction times).** Legend: F = F-test; DF-b = degrees of  
339 freedom between; DF-w = degrees of freedom within; p = p-values

340

341 *Task*

342 Critically, RT data showed no significant main effect of **Task**, that is, the two tasks were  
343 behaviourally matched overall (Figure 2E).

344

345 *Cognitive challenge*

346 INTERACTIONS

347 We found both a significant **Task x Auditory Challenge** and a **Task x Visual Challenge**  
348 interaction (Figure 2C-D). This implied that the difference between High-challenge and Low-  
349 challenge was significantly larger in the Naming than in the Judgment task.

350 MAIN EFFECTS

351 There was a significant main effect of both **Auditory Challenge** and **Visual Challenge**. As  
352 predicted, High-challenge conditions resulted in significantly slower RTs with respect to Low-  
353 challenge (Figure 2F-G) conditions.

354

355 *tDCS*

356 INTERACTIONS

357 There was a significant three-way **Task x Visual Challenge x tDCS** interaction. This showed  
358 that – with respect to Sham tDCS – Anodal tDCS significantly reduced RTs in Low-challenge  
359 conditions across both tasks, whereas in High-challenge conditions there was an opposite  
360 non-significant effect of tDCS: a trend to increased RTs (slower responses) in the Naming task  
361 and a trend to reduced RTs (faster responses) in the Judgment task (cf. Figure 2B).

362 This result was consistent with a significant **Visual Challenge x tDCS** interaction, where – with  
363 respect to Sham tDCS – Anodal tDCS significantly reduced RTs for Low-challenge ( $p=0.013$ )  
364 but not for High-challenge ( $p=0.878$ ) conditions, irrespective of task.

#### 365 MAIN EFFECTS

366 Finally, we found no significant main effect of **tDCS**. However, to test whether previous results  
367 from our group could be replicated, we ran a subsidiary ANOVA only on the Low-challenge  
368 visual condition, that is, the most similar condition to the one used in our previous picture  
369 naming study (i.e., no visual masking; cf. Holland et al., 2011). This revealed a significant main  
370 effect of **tDCS** ( $p=0.014$ ), showing that Anodal tDCS significantly reduced RTs both in the  
371 Naming and in the Judgment task with respect to Sham tDCS (cf. three-way interaction above  
372 and Low-challenge bars in Figure 2B).

373

374 In summary, behavioural results showed that: i) the two tasks were equally demanding; ii) the  
375 challenge modulation was effective in both modalities, in the predicted direction (High>Low),  
376 and with a wider range in the Naming task; iii) Anodal tDCS significantly facilitated visually  
377 Low-challenge (but not High-challenge) conditions in both tasks.

378



**A) ALL CONDITIONS**

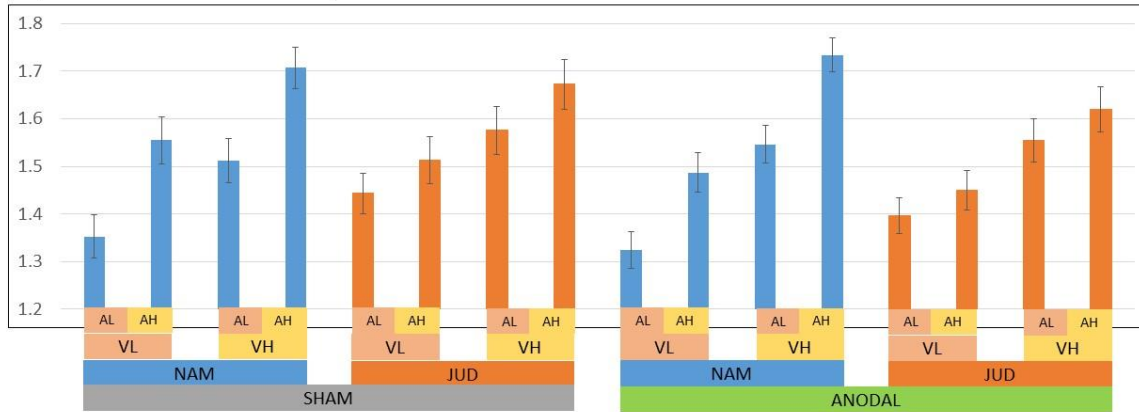

**B) TASK x VISUAL CHALLENGE x tDCS**

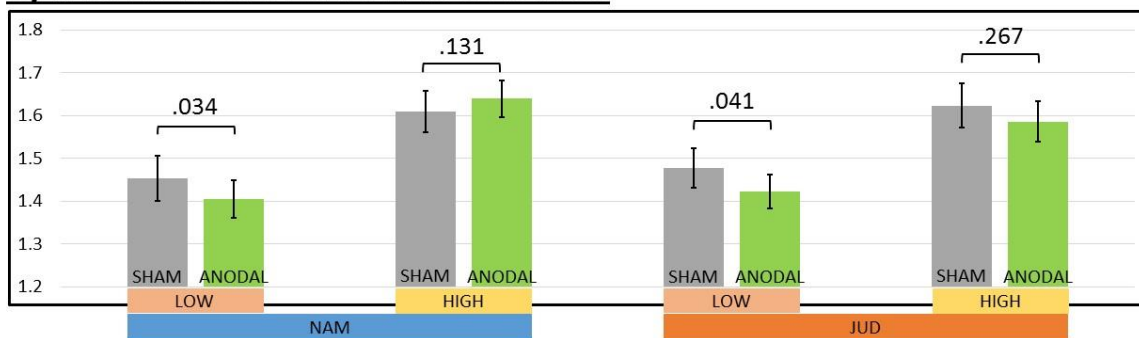

**C) TASK x AUDITORY CHALLENGE**

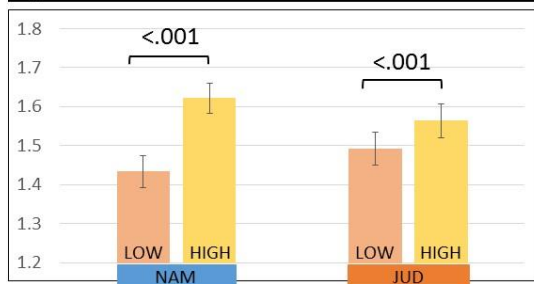

**D) TASK x VISUAL CHALLENGE**

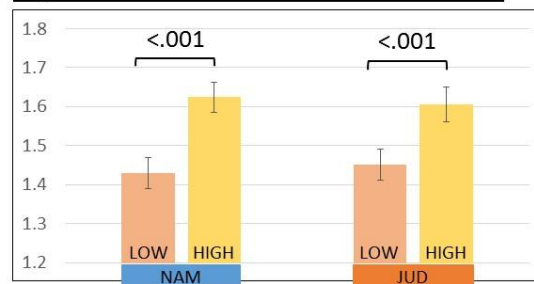

**E) TASK**

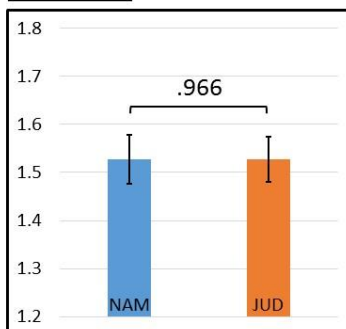

**F) AUDITORY CHALL.**

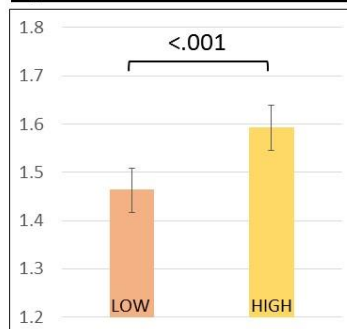

**G) VISUAL CHALL.**

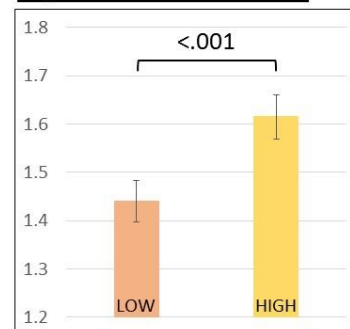

379

380 **Figure 2 – Behavioural results (reaction times).** A) Bars showing all experimental conditions. B) Task  
 381 x Visual challenge x tDCS interaction (averaged across Auditory challenge). C) Task x Auditory challenge  
 382 interaction (averaged across Visual challenge). D) Task x Visual challenge interaction (averaged across  
 383 Auditory challenge). E) Main effect of Task (averaged across Auditory challenge, Visual challenge, and  
 384 tDCS). F) Main effect of Auditory challenge (averaged across tasks, Visual challenge, and tDCS). G)  
 385 Main effect of Visual challenge (averaged across tasks, Auditory challenge, and tDCS). All post-hoc

386 comparisons are computed two-tailed. Legend: NAM = Naming; JUD = Judgment; AL = Auditory Low-  
387 challenge; HL = Auditory High-challenge; VL = Visual Low-challenge; VH = Visual High-challenge; LOW  
388 = Low-challenge; HIGH = High-challenge. Y axis in plots shows reaction time (RTs) in seconds.

389

### 390 ***Imaging results***

#### 391 *Task*

392 The Naming and the Judgment tasks showed the recruitment of a widespread, largely  
393 overlapping neural network. This was revealed by the main effect of experiment  
394 (***Naming&Judgment>Rest***; Figure 3A) and confirmed by the contrasts ***Naming>Rest*** and  
395 ***Judgment>Rest*** (cf. Supplemental Figure S1A-B). It comprised bilateral inferior frontal cortices  
396 (although most prominently on the left, including the opercular, triangular, and orbital parts),  
397 most nodes of the MDS such as anterior insular cortices, premotor cortices, pre-  
398 supplementary motor areas, dorsal anterior cingulate cortices, posterior parietal cortices, as  
399 well as visual (occipital, occipito-temporal, and occipito-parietal) and auditory (superior  
400 temporal, middle temporal, temporal polar, and inferior parietal) cortices (Table 2).

401 A direct comparison between the two tasks (i.e., main effect of Task: ***Naming>Judgment***)  
402 showed a subset of areas within this common network significantly more activated in the  
403 Naming than in the Judgment task (Figure 3B). This included bilateral portions of the inferior  
404 frontal cortices (more widespread on the left, including bilateral opercular and orbital, and  
405 left triangular parts), anterior insular cortices, premotor cortices, superior temporal and  
406 inferior parietal cortices, temporal poles, as well as visual (occipital and occipito-temporal)  
407 cortices, plus the left dorsal anterior cingulate cortex. Outside the common network,  
408 significant activations were found in bilateral ventral medial prefrontal cortices, and in the  
409 right precuneus (Table 2). The reverse contrast (***Judgment>Naming***) showed no significant  
410 results.

411

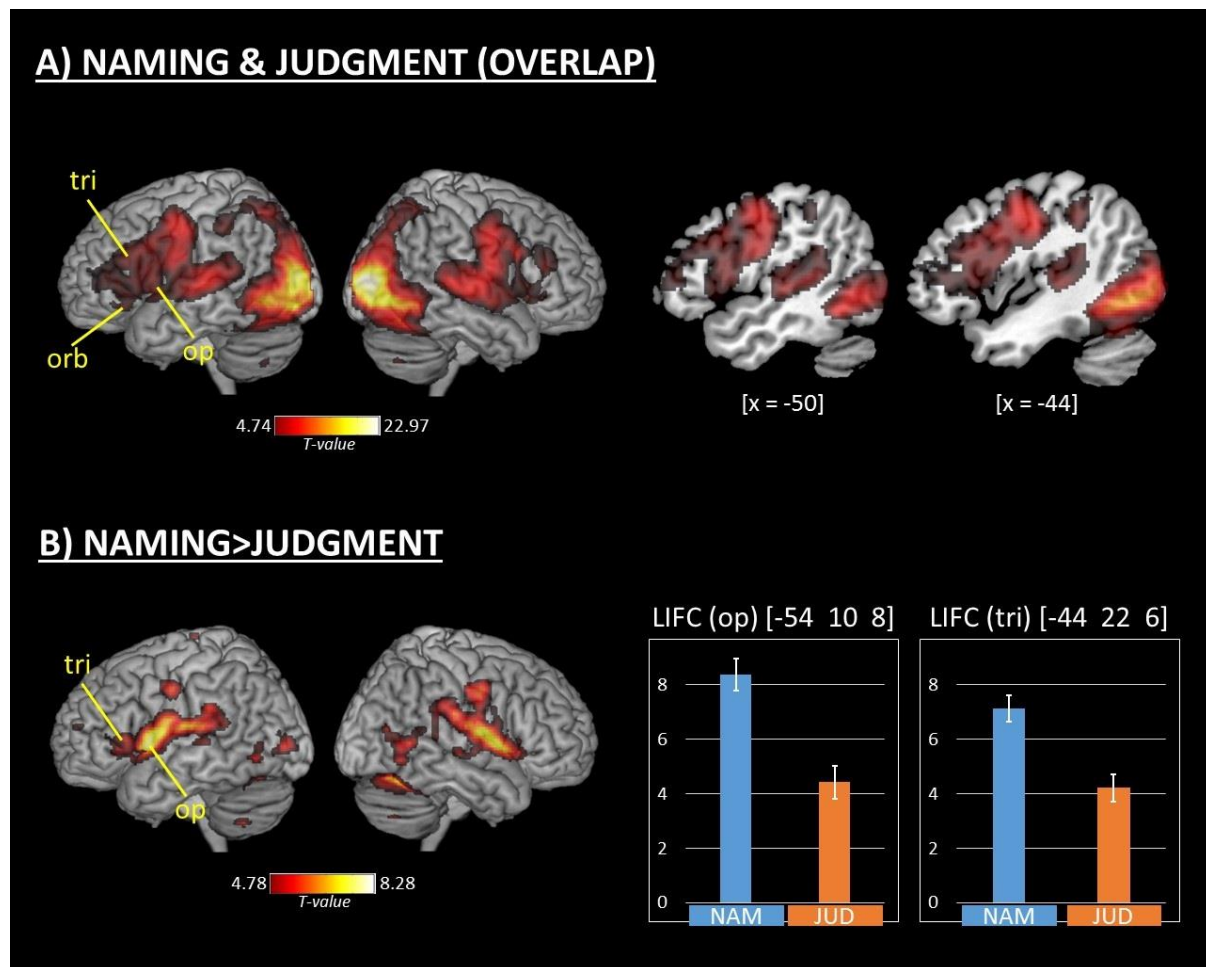

413 **Figure 3 – Tasks-related activations.** A) Areas activated by both Naming and Judgment tasks (i.e., main  
 414 effect of experiment, or Naming & Judgment > Rest; cf. also Supplementary Figure S1A-B). B) Areas  
 415 activated more in the Naming than in the Judgment task (i.e., main effect of Task). Legend: op =  
 416 opercular part of the LIFC; tri = triangular part of the LIFC; orb = orbital part of the LIFC; NAM = Naming;  
 417 JUD = Judgment. Y axis in plots shows effect size of BOLD response in arbitrary units.

418

| Contrast                                      | Overlap (Naming & Judgment) |           |         |      | Naming > Judgment |           |         |      |      |
|-----------------------------------------------|-----------------------------|-----------|---------|------|-------------------|-----------|---------|------|------|
|                                               | Region                      | x y z     | p(FWE)  | K    | T                 | x y z     | p(FWE)  | K    | T    |
| <i>L inferior frontal cortex (opercular)</i>  |                             | -48 12 14 | < 0.001 | 9065 | 7.50              | -54 10 8  | < 0.001 | 2819 | 6.76 |
| <i>R inferior frontal cortex (opercular)</i>  |                             | 44 12 12  | < 0.001 | 7139 | 5.87              | 50 16 4   | < 0.001 | 4014 | 4.89 |
| <i>L inferior frontal cortex (triangular)</i> |                             | -36 18 26 | < 0.001 | 9065 | 9.63              | -38 22 8  | < 0.001 | 2819 | 5.82 |
| <i>R inferior frontal cortex (triangular)</i> |                             | 36 30 10  | < 0.001 | 7139 | 7.62              | -         | -       | -    | -    |
| <i>L inferior frontal cortex (orbital)</i>    |                             | -34 28 -6 | < 0.001 | 9065 | 6.99              | -42 26 -2 | < 0.001 | 2819 | 5.26 |
| <i>R inferior frontal cortex (orbital)</i>    |                             | 32 32 -6  | < 0.001 | 7139 | 6.05              | 48 18 -4  | < 0.001 | 4014 | 5.81 |
| <i>L anterior insular cortex</i>              |                             | -28 26 0  | < 0.001 | 9065 | 8.38              | -32 14 10 | < 0.001 | 2819 | 6.11 |
| <i>R anterior insular cortex</i>              |                             | 30 26 2   | < 0.001 | 7139 | 9.56              | 34 14 6   | < 0.001 | 4014 | 6.50 |
| <i>L premotor cortex</i>                      |                             | -46 -8 44 | < 0.001 | 9065 | 11.51             | -48 -8 40 | < 0.001 | 184  | 6.26 |
| <i>R premotor cortex</i>                      |                             | 50 -4 38  | < 0.001 | 7139 | 11.07             | 50 -6 40  | < 0.001 | 4014 | 6.10 |
| <i>L pre-supplementary motor area</i>         |                             | -6 10 52  | < 0.001 | 974  | 7.62              | -         | -       | -    | -    |
| <i>R pre-supplementary motor area</i>         |                             | 8 2 62    | < 0.001 | 974  | 6.14              | -         | -       | -    | -    |

|                                           |            |        |       |       |            |        |      |      |
|-------------------------------------------|------------|--------|-------|-------|------------|--------|------|------|
| <i>L dorsal anterior cingulate cortex</i> | -8 20 38   | <0.001 | 974   | 5.46  | -6 16 36   | <0.001 | 50   | 5.80 |
| <i>R dorsal anterior cingulate cortex</i> | 12 12 44   | <0.001 | 974   | 6.38  | -          | -      | -    | -    |
| <i>L posterior parietal cortex</i>        | -24 -50 48 | <0.001 | 22654 | 8.16  | -          | -      | -    | -    |
| <i>R posterior parietal cortex</i>        | 22 -58 46  | <0.001 | 22654 | 10.62 | -          | -      | -    | -    |
| <i>L occipital cortex</i>                 | -28 -88 12 | <0.001 | 22654 | 20.02 | -          | -      | -    | -    |
| <i>R occipital cortex</i>                 | 30 -88 8   | <0.001 | 22654 | 22.97 | -          | -      | -    | -    |
| <i>L occipito-temporal cortex</i>         | -42 -68 -6 | <0.001 | 22654 | 15.68 | -42 -64 -6 | <0.001 | 3295 | 6.13 |
| <i>R occipito-temporal cortex</i>         | 40 -60 -10 | <0.001 | 22654 | 15.66 | 40 -56 -10 | <0.001 | 3295 | 5.98 |
| <i>L occipito-parietal cortex</i>         | -24 -66 38 | <0.001 | 22654 | 10.09 | -          | -      | -    | -    |
| <i>R occipito-parietal cortex</i>         | 26 -66 38  | <0.001 | 22654 | 11.20 | -          | -      | -    | -    |
| <i>L superior temporal cortex</i>         | -62 -26 6  | <0.001 | 9065  | 11.47 | -64 -26 16 | <0.001 | 2819 | 6.62 |
| <i>R superior temporal cortex</i>         | 58 -18 2   | <0.001 | 7139  | 11.28 | 62 -10 6   | <0.001 | 4014 | 5.63 |
| <i>L superior temporal pole</i>           | -58 -6 -4  | <0.001 | 9065  | 5.68  | -56 8 2    | <0.001 | 2819 | 7.80 |
| <i>R superior temporal pole</i>           | 60 8 -2    | <0.001 | 7139  | 6.62  | 60 8 0     | <0.001 | 4014 | 6.29 |
| <i>L supramarginal gyrus</i>              | -48 -40 26 | <0.001 | 9065  | 5.75  | -52 -34 28 | <0.001 | 2819 | 6.12 |
| <i>R supramarginal gyrus</i>              | 64 -20 20  | <0.001 | 7139  | 5.60  | 68 -24 24  | <0.001 | 4014 | 6.45 |
| <i>R precuneus</i>                        | -          | -      | -     | -     | 4 -52 54   | <0.001 | 87   | 6.11 |
| <i>L medial prefrontal cortex</i>         | -          | -      | -     | -     | -8 54 6    | <0.001 | 4014 | 6.39 |
| <i>R medial prefrontal cortex</i>         | -          | -      | -     | -     | 10 46 2    | <0.001 | 4014 | 6.61 |

419

420 **Table 2 - Tasks-related activations.** Legend: R = right; L = left; x y z = MNI coordinates; K = cluster size;  
 421 T = t-scores; p(FWE) = family-wise error corrected p-values

422

423 *Cognitive challenge*

424 INTERACTIONS

425 Mirroring our behavioural results, there were significant **Task x Auditory Challenge** and **Task**  
 426 **x Visual Challenge** interactions. In the auditory modality, effects were found in three LIFC  
 427 clusters (opercular, triangular, and orbital parts) as well as in the pre-supplementary motor  
 428 area (Figure 4A, Table 3). Critically, activation patterns in all these nodes showed that – as  
 429 compared with Low-challenge conditions – High-challenge conditions were associated with  
 430 increased BOLD response in the Naming task, but with decreased BOLD response in the  
 431 Judgment task (cf. plots in Figure 4A), i.e. a differential activation pattern across conditions in  
 432 the two tasks in the same sub-regions. In the visual modality, a significant cluster was  
 433 identified in the right inferior occipito-temporal cortex (Figure 3B, Table 3), also showing that  
 434 – as compared with Low-challenge conditions – High-challenge conditions were associated  
 435 with increased BOLD response in the Naming task, but with decreased BOLD response in the  
 436 Judgment task.

437 In the visual modality, activations in the LIFC did not survive whole-brain correction. However,  
438 in order to test whether there was any sub-threshold cluster in the **Task x Visual Challenge**  
439 contrast showing an activation pattern such as the one identified by the **Task x Auditory**  
440 **challenge**, we performed a region-of-interest (ROI) analysis. Accordingly, a small-volume-  
441 correction within three spheres of 10 mm radius centred in the peaks of the four clusters  
442 identified by the **Task x Auditory Challenge** contrast (i.e., orthogonal to the one tested; cf.  
443 coordinates in the top-left panel of Table 3) was applied. This analysis revealed significant  
444 visual modulatory effects in all sub-regions (see top-right panel of Table 3), showing exactly  
445 the same activation pattern as in the auditory modality (i.e., **Task x Auditory challenge**  
446 interaction), in exactly the same neural network (three clusters in the LIFC; cf. plots in Figure  
447 4B).

#### 448 MAIN EFFECTS

449 The main effect of **Auditory challenge** was a significant modulation of bilateral visual and  
450 auditory activations (Supplemental Figure S1C, Table 3). In the auditory modality, the contrast  
451 **High-challenge>Low-challenge** revealed increased activity in associative (occipital and  
452 occipito-temporal) visual regions, at the border between the right premotor cortex and the  
453 right inferior frontal cortex (opercular part; see Figure 4C) and in the pre-supplementary  
454 motor area. The contrast **Low-challenge>High-challenge** showed increased activity in  
455 bilateral auditory (superior temporal, extending into the middle temporal) cortices, and the  
456 precuneus.

457 The main effect of **Visual challenge** was a significant modulation of activity in bilateral visual  
458 cortices (Supplemental Figure S1D, Table 3). In the visual modality, the contrast **High-**  
459 **challenge>Low-challenge** showed increased activity in primary and secondary (occipital)  
460 visual areas, whereas the contrast **Low-challenge>High-challenge** showed increased activity  
461 in associative (occipito-temporal and occipito-parietal) visual areas (extending into the  
462 inferior parietal cortex), and the precuneus.

463 Critically, neither the main effect of **Auditory challenge** nor the main effect of **Visual**  
464 **challenge** showed significant modulations of brain activity in the LIFC.

465



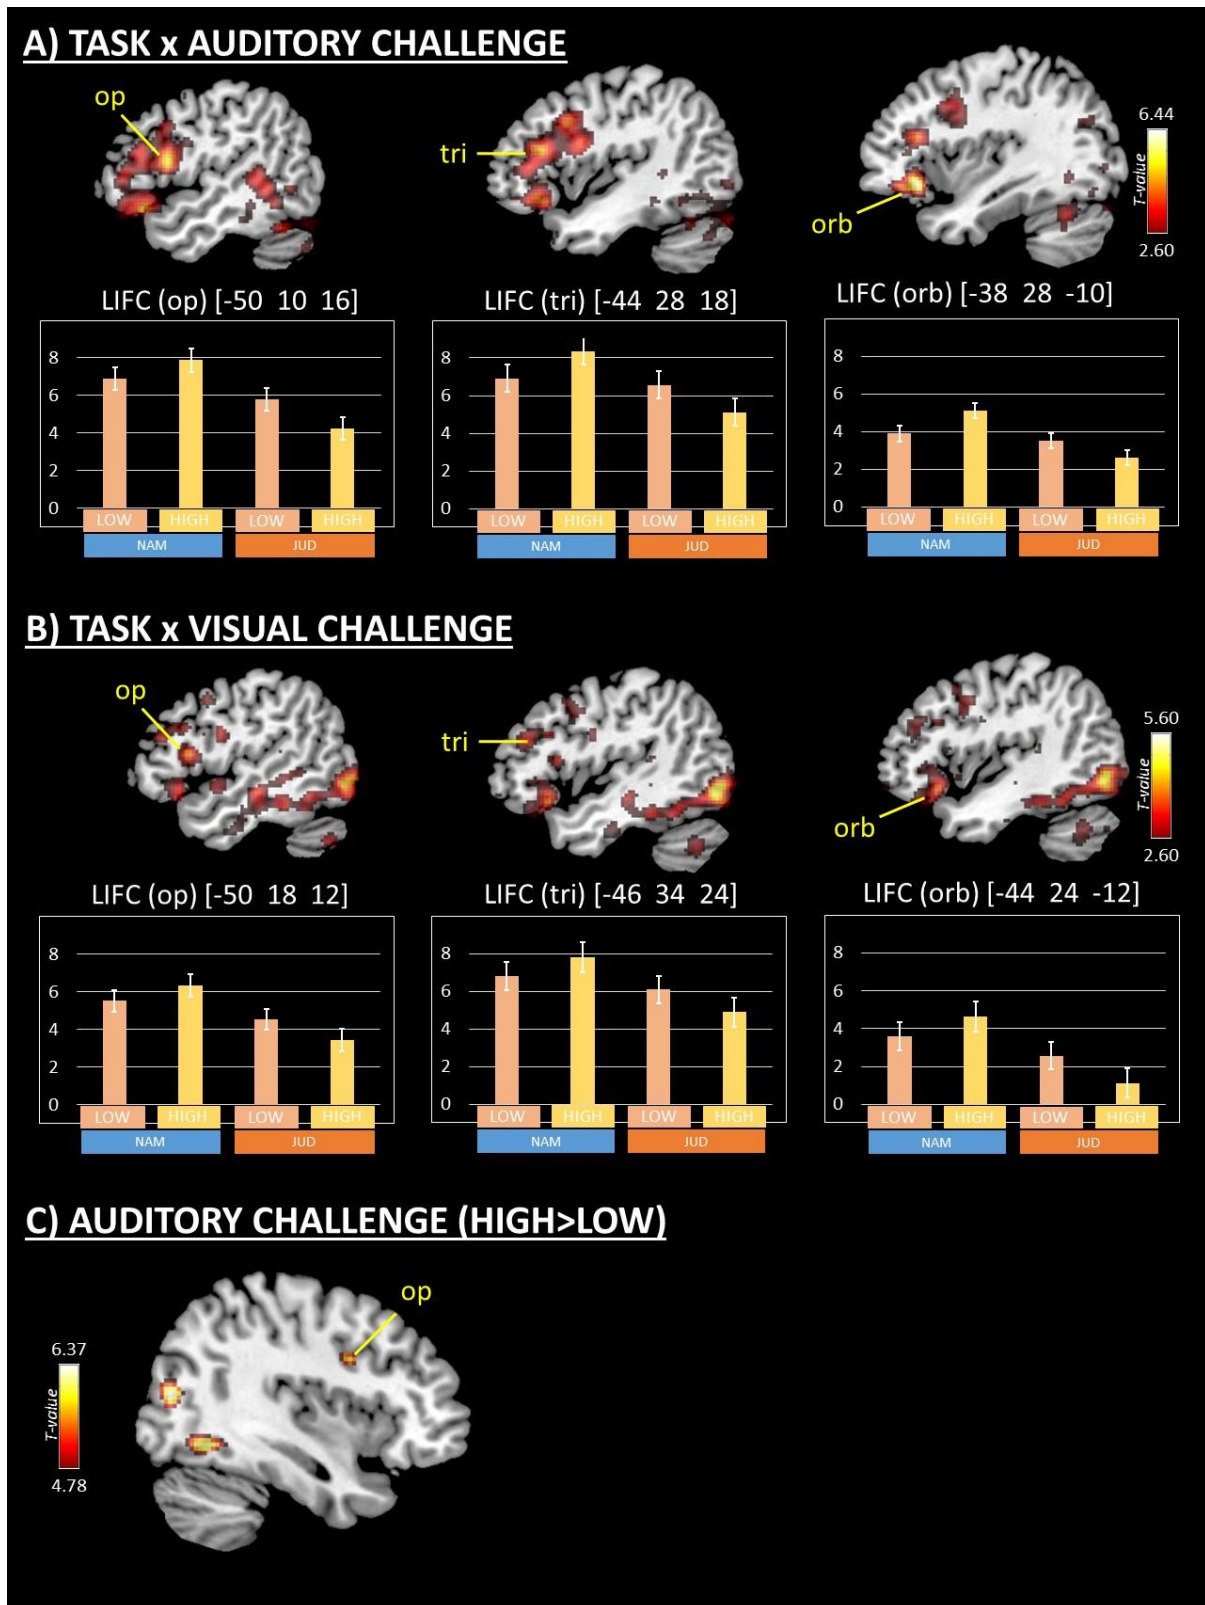

466

467 **Figure 4 – Cognitive challenge-related activations in the LIFC.** A) Areas activated by the Task x  
 468 Auditory challenge interaction. B) Areas activated by the Task x Visual challenge interaction. C) Areas  
 469 associated with Auditory challenge (High->Low-challenge). In (A) and (B) activations are shown at  $p$   
 470  $<0.005$ -unc. for display purposes. Peaks shown in (A) are significant at whole-brain level ( $p < 0.05$  FWE-  
 471 corr.). Peaks shown in (B) survive small-volume correction (cf. main text). In (C) activations are shown  
 472 at  $p < 0.05$  FWE-corr. Legend: op = opercular part of the LIFC; tri = triangular part of the LIFC; orb =

473 orbital part of the LIFC; NAM = Naming; JUD = Judgment; LOW = Low-challenge; HIGH = High-challenge.

474 Y axis in plots shows effect size of BOLD response in arbitrary units.

475

| Contrast                                      | TASK x AUDITORY CHALLENGE   |         |        |       |            | TASK x VISUAL CHALLENGE     |             |   |       |
|-----------------------------------------------|-----------------------------|---------|--------|-------|------------|-----------------------------|-------------|---|-------|
|                                               | Region                      | x y z   | p(FWE) | K     | T          | x y z                       | p(SVC*/FWE) | K | T     |
| <i>L inferior frontal cortex (opercular)</i>  | -50 10 16                   | 0.006   | 17     | 5.20  | -50 18 12  | 0.002*                      |             |   | 4.18  |
| <i>L inferior frontal cortex (triangular)</i> | -44 28 18                   | 0.022   | 4      | 4.93  | -46 34 24  | 0.011*                      |             |   | 3.64  |
| <i>L inferior frontal cortex (orbital)</i>    | -38 28 -10                  | < 0.001 | 53     | 6.44  | -44 24 -12 | 0.002*                      |             |   | 4.14  |
| <i>R posterior middle-temporal cortex</i>     | -                           | -       | -      | -     | 60 -56 -6  | < 0.001                     | 85          |   | 5.60  |
| <i>L pre-supplementary motor area</i>         | -4 14 56                    | < 0.001 | 55     | 5.77  | 2 18 62    | 0.012*                      |             |   | 3.62  |
| Contrast                                      | AUDITORY CHALLENGE HIGH>LOW |         |        |       |            | AUDITORY CHALLENGE LOW>HIGH |             |   |       |
| Region                                        | x y z                       | p(FWE)  | K      | T     | x y z      | p(FWE)                      | K           | T |       |
| <i>L occipital cortex</i>                     | -30 -84 12                  | < 0.001 | 103    | 5.55  | -          | -                           | -           | - | -     |
| <i>R occipital cortex</i>                     | 38 -78 14                   | < 0.001 | 117    | 6.37  | -          | -                           | -           | - | -     |
| <i>L ventral occipital cortex</i>             | -42 -68 -6                  | < 0.001 | 120    | 6.30  | -          | -                           | -           | - | -     |
| <i>R ventral occipital cortex</i>             | 40 -62 -10                  | < 0.001 | 265    | 6.19  | -          | -                           | -           | - | -     |
| <i>L dorsal occipital cortex</i>              | -26 -76 32                  | 0.002   | 28     | 5.08  | -          | -                           | -           | - | -     |
| <i>R dorsal occipital cortex</i>              | 24 -66 42                   | < 0.001 | 149    | 5.96  | -          | -                           | -           | - | -     |
| <i>R inferior frontal cortex (opercular)</i>  | 38 6 30                     | < 0.001 | 53     | 5.83  | -          | -                           | -           | - | -     |
| <i>R pre-supplementary motor area</i>         | 10 10 52                    | 0.022   | 4      | 5.05  | -          | -                           | -           | - | -     |
| <i>L precuneus</i>                            | -                           | -       | -      | -     | -10 -48 38 | < 0.001                     | 95          |   | 6.29  |
| <i>R precuneus</i>                            | -                           | -       | -      | -     | 10 -54 40  | 0.019                       | 5           |   | 4.96  |
| <i>L middle temporal cortex</i>               | -                           | -       | -      | -     | -60 -18 2  | < 0.001                     | 3532        |   | 16.72 |
| <i>R middle temporal cortex</i>               | -                           | -       | -      | -     | 58 -32 2   | < 0.001                     | 2435        |   | 9.85  |
| <i>L superior temporal cortex</i>             | -                           | -       | -      | -     | -58 -10 0  | < 0.001                     | 3532        |   | 13.68 |
| <i>R superior temporal cortex</i>             | -                           | -       | -      | -     | 58 -10 0   | < 0.001                     | 2435        |   | 12.30 |
| <i>L angular gyrus</i>                        | -                           | -       | -      | -     | -54 -58 38 | < 0.001                     | 3532        |   | 5.20  |
| Contrast                                      | VISUAL CHALLENGE HIGH>LOW   |         |        |       |            | VISUAL CHALLENGE LOW>HIGH   |             |   |       |
| Region                                        | x y z                       | p(FWE)  | K      | T     | x y z      | p(FWE)                      | K           | T |       |
| <i>L occipital cortex</i>                     | -16 -96 6                   | < 0.001 | 845    | 9.87  | -          | -                           | -           | - | -     |
| <i>R occipital cortex</i>                     | 18 -96 8                    | < 0.001 | 823    | 11.38 | -          | -                           | -           | - | -     |
| <i>L posterior middle-temporal cortex</i>     | -                           | -       | -      | -     | -52 -66 4  | < 0.001                     | 1360        |   | 7.49  |
| <i>R posterior middle-temporal cortex</i>     | -                           | -       | -      | -     | 52 -56 4   | < 0.001                     | 278         |   | 7.25  |
| <i>L angular gyrus</i>                        | -                           | -       | -      | -     | -42 -72 40 | < 0.001                     | 1360        |   | 7.07  |
| <i>R angular gyrus</i>                        | -                           | -       | -      | -     | 44 -70 40  | < 0.001                     | 224         |   | 7.26  |
| <i>L/R precuneus</i>                          | -                           | -       | -      | -     | -2 -56 42  | < 0.001                     | 156         |   | 5.71  |
| <i>L supramarginal gyrus</i>                  | -                           | -       | -      | -     | -52 -26 28 | 0.003                       | 27          |   | 5.50  |

476

477 **Table 3 - Cognitive challenge-related activations.** Legend: R = right; L = left; x y z = MNI coordinates;

478 K = cluster size; T = t-scores; p(FWE) = family-wise error corrected p-values; p(SVC\*) = small-volume-

479 corrected p-values

480

481



482

483 MAIN EFFECTS AT A LOWER THRESHOLD

484 The MDS theory predicts that increasing cognitive challenge is associated with increased  
485 activity within the MDS, and indeed we found that both the Naming and the Judgment tasks  
486 significantly recruited several classical MDS nodes (cf. overlap in Figure 3A and Table 2). We  
487 then used this same overlap map as a masking ROI for the contrasts **High-challenge>Low-**  
488 **challenge** to qualitatively check whether challenge-related modulations in the MDS occurred  
489 sub-threshold ( $p < 0.005$ -unc.). This revealed activity in several MDS nodes: bilateral anterior  
490 insular cortices, premotor cortices, dorsal anterior cingulate cortices, pre-supplementary  
491 motor areas, and posterior parietal cortices in both modalities (cf. Figure 5 and  
492 Supplementary Table ST1). Critically, none of these regions exhibited an activation pattern  
493 similar to the one identified in the LIFC. Indeed – in line with the MDS theory predictions – all  
494 these regions show an increased activity in High-challenge conditions vs. Low-challenge  
495 conditions in both tasks (although often with a larger observed effect in the Naming task).

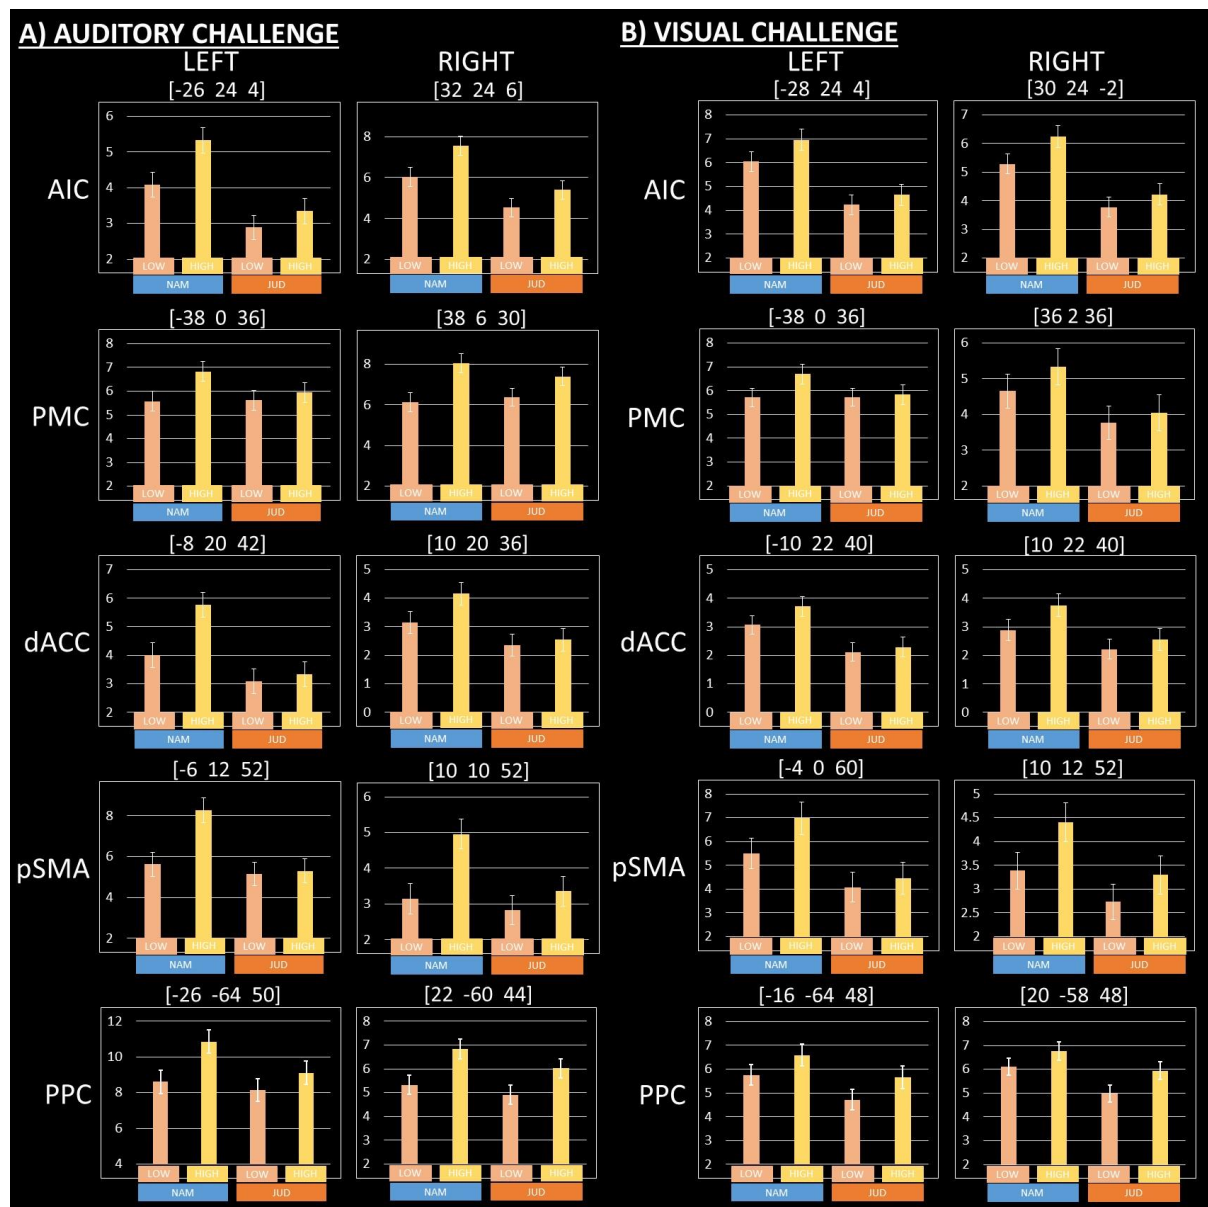

497 **Figure 5 – Cognitive challenge-related activations in other Multiple-Demand System (MDS) nodes,**  
 498 **showing the same activation patterns in the two tasks. A) Modulation by Auditory challenge. B)**  
 499 **Modulation by Visual challenge. Number in square brackets report MNI coordinates (x y z) of the peak**  
 500 **plotted (cf. Supplementary Table ST2). Legend: NAM = Naming; JUD = Judgment; LOW = Low-**  
 501 **challenge; HIGH = High-challenge; AIC = anterior insular cortex; PMC = premotor cortex; dACC = dorsal**  
 502 **anterior cingulate cortex; pSMA = pre-supplementary motor area; PPC = posterior parietal cortex. Y**  
 503 **axis in plots shows effect size of BOLD response in arbitrary units.**

504

505 *tDCS*

506 INTERACTIONS

507 We did not find any significant interaction with tDCS at the chosen statistical threshold  
 508 ( $p < 0.05$  FWE-corrected). However, mirroring our behavioural results, we found a sub-

509 threshold **Task x Visual Challenge x tDCS** interaction in the LIFC (triangular part; see Figure  
510 6). This region was located in the same area identified by a previous study of ours showing  
511 that Anodal tDCS – delivered to the LIFC, consistent electrode montage as in the present study  
512 – was associated with reduced activity in this area during speech production (Holland et al.,  
513 2011). Hence, in order to formally test this sub-threshold activation, we performed an ROI  
514 analysis. Accordingly, a small-volume-correction within a sphere of 10 mm radius centred in  
515 the triangular part of the LIFC (x y z = -48 32 19; cf. Holland et al., 2011) was applied. This  
516 analysis showed a significant modulatory effect (x y z = -52 36 10; T = 3.28; p = 0.032),  
517 replicating our previous naming results. Here, the activation pattern showed that – with  
518 respect to Sham tDCS – Anodal tDCS was associated with a greater reduction in BOLD  
519 response in Low-challenge than High-challenge conditions in the Naming task, and vice-versa  
520 in the Judgment task (i.e., greater reduction in BOLD response in High-challenge than Low-  
521 challenge conditions; cf. plot in Figure 6).

#### 522 MAIN EFFECTS

523 A significant main effect of **tDCS (Anodal>Sham)** was found in the left visual cortex (x y z = -  
524 28 -80 6; cluster size = 13; T = 5.25; p = 0.008 FWE-corr.) showing reduced BOLD response  
525 during Anodal tDCS with respect to Sham tDCS across tasks and cognitive challenge  
526 conditions.

527

528 In summary, imaging results showed that: i) the Naming and the Judgment tasks extensively  
529 overlapped in the LIFC, although some specific sub-regions within it were more activated by  
530 the Naming task; ii) activation patterns in three sub-regions in the LIFC showed that – as  
531 compared with Low-challenge conditions – High-challenge conditions were associated with  
532 increased BOLD response in the Naming task, but with decreased BOLD response in the  
533 Judgment task, in striking contrast with activation patterns in all other MDS nodes (which  
534 showed High>Low in both tasks); iii) a neural effect of tDCS was found in the LIFC, further  
535 modulated by Task and Visual challenge.

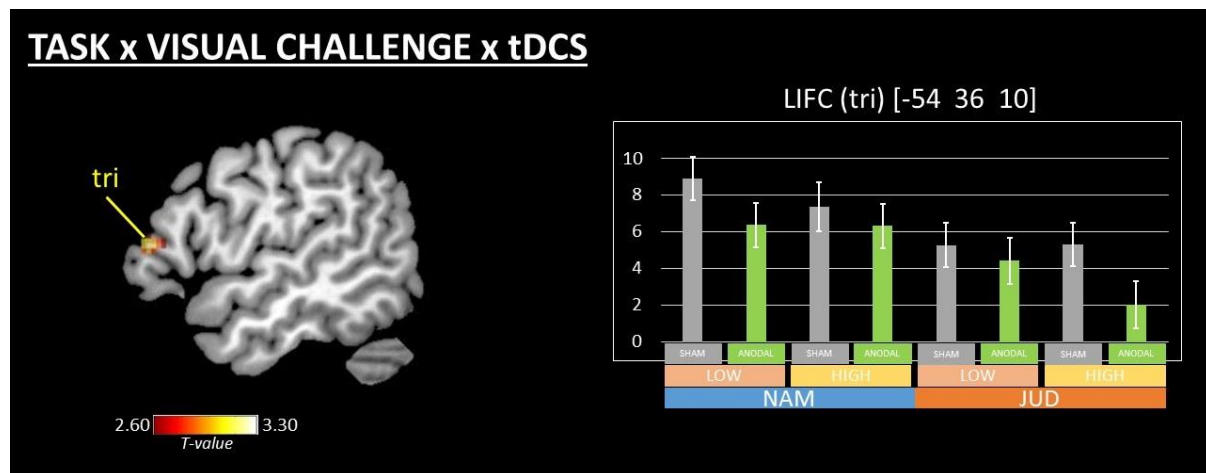

536

537 **Figure 6 – tDCS-related modulations.** Areas activated by the Task x Visual challenge x tDCS interaction.  
538 Activation is shown at  $p < 0.005$ -unc. for display purposes. The peak shown survives small-volume  
539 correction (cf. main text). Legend: tri = triangular part of the LIFC; NAM = Naming; JUD = Judgment;  
540 SHAM = sham tDCS; ANODAL = anodal tDCS; LOW = Low-challenge; HIGH = High-challenge. Y axis in  
541 plots shows effect size of BOLD response in arbitrary units.

542

## 543 DISCUSSION

544 The present study investigated the evidence of domain-specific and domain-general regions  
545 within the LIFC, by modulating task domain, cognitive challenge, and Anodal tDCS delivered  
546 to the LIFC. The effect of task domain showed that – in the context of matched behavioural  
547 performance – a linguistic and a non-linguistic task engaged a common widespread portion  
548 of the LIFC, although part of this shared neural substrate was significantly more active in the  
549 linguistic task. Behaviourally, the effect of cognitive challenge showed that – as predicted –  
550 High-challenge conditions had slower RTs with respect to Low-challenge conditions across  
551 both tasks and sensory modalities. Functionally, this was mirrored in all MDS nodes, with the  
552 notable exception of the LIFC, where three different sub-regions showed opposite activation  
553 patterns. Compared to Low-challenge conditions, High-challenge conditions were associated  
554 with an increased BOLD response in the Naming task, but a decreased BOLD response in the  
555 Judgment task. Importantly, these results show that these sub-regions within the LIFC have a  
556 unique functional profile in the brain, one that suggests domain-specificity, with a preferential  
557 processing for Naming. Finally, Anodal tDCS delivered to the LIFC showed a significant  
558 modulation of both behaviour and brain, across tasks, and an interaction with Visual  
559 challenge. Behaviourally, it reduced RTs for Low-challenge but not High-challenge conditions  
560 across both tasks, i.e. what was easy with Sham was made even easier with Anodal tDCS.

561 Functionally, it resulted in reduced BOLD response in a specific sub-region within the LIFC  
562 (triangular part) modulated in interaction with Task and Visual challenge.

563

#### 564 *Effect of task*

565 Our data show that both a linguistic and a behaviourally-matched non-linguistic task using  
566 exactly the same stimuli and type of response recruited a common widespread neural  
567 network including several brain areas, and – notably – a large portion of the LIFC (comprising  
568 the opercular, triangular, and orbital parts). Such overlapping activation across tasks is  
569 consistent with a domain-general view of the functional role of the LIFC. However, it is still  
570 possible that within this extensive region, smaller peaks associated with either linguistic or  
571 non-linguistic processing are present in slightly different locations across subjects due to  
572 inter-subject variability in functional neuroanatomy (cf. Fedorenko et al., 2012, 2013). Our  
573 study was not designed to address the issue of inter-subject variability in functional  
574 neuroanatomy, but rather to investigate modulatory effects at the group level in order to  
575 make inferences about the general population. As such, at the group level overall the LIFC is  
576 crucially involved in both tasks.

577 Nevertheless – notwithstanding the behavioural matching – a portion of the overlapping  
578 region in the LIFC (i.e., ventral/posterior opercular and triangular parts) showed higher  
579 activation in the Naming than in the Judgment task (cf. ***Naming>Judgment*** contrast; Figure  
580 3B), an evidence of domain-specificity in these sub-regions. In language-specific areas within  
581 the LIFC, Fedorenko et al. (2012) have previously reported negative and/or flattened activity  
582 patterns associated with domain-general processing (i.e., little-to-no involvement in non-  
583 linguistic tasks) across different tasks and stimuli. In the present study, we considered it  
584 critical to match task response (overt speech) and stimuli characteristics for across domain  
585 comparison (i.e., Y/N vs. Naming). In particular, the use of a cognitive challenge framework  
586 (Low-challenge vs. High-challenge) allowed uncertainty in speech response parameters (RTs)  
587 to be taken into account when examining effects across domains. This meant that both tasks  
588 were likely to rely on a shared circuitry for selecting a spoken response, but within this speech  
589 network there would likely be a gradient in which the Naming task would be more likely to  
590 rely on language-specific components than the Judgment task. By gradient here we mean an

591 increase in the magnitude of activation observed during the Naming task as opposed to the  
592 Judgment task. Therefore, the greater increase in activation during Naming might be related  
593 to the increased language selection resources needed to select the target word among a  
594 higher number of lexical competitors (Thompson-Schill et al., 1997; Snyder et al., 2007; Rodd  
595 et al., 2010a; January et al., 2009; Vitello et al., 2014; Hsu et al., 2017), compared to the  
596 Judgment task where the cognitive ambiguity of the decision was varied (RTs), but lexical  
597 competition demand was low throughout, i.e. binary Yes/No response.

598

### 599 *Effect of cognitive challenge*

600 In the present study, our main result is that three different sub-regions within the LIFC  
601 (located in the opercular, triangular, and orbital parts) exhibit exactly the same modulatory  
602 pattern irrespective of the sensory modality involved (i.e., a genuine effect of cognitive  
603 challenge, unrelated to the stimulus material at hand). Accordingly, as compared to Low-  
604 challenge conditions, in High-challenge conditions activity in these areas increased in the  
605 Naming task, whereas it decreased in the Judgment task (cf. Figure 4A-B). Importantly, this  
606 was observed in conjunction with RT data that clearly show a consistent effect (i.e., slower  
607 responses for High-challenge conditions) in both tasks and sensory modalities (cf. Figure 2F-  
608 G), consistent with subjects performing a harder, more demanding task. In both tasks and  
609 sensory modalities, High-challenge (i.e., increased cognitive demand) is associated with a  
610 higher degree of ambiguity in identifying the various items. However, such an ambiguity has  
611 a differential impact on semantic search in the two tasks, namely retrieving the exact linguistic  
612 label of a given object in Naming vs. retrieving overall visuo-spatial characteristics in  
613 Judgment. Our data suggest that these specific sub-regions in the LIFC are associated with the  
614 former (but not the latter) process.

615 The evidence of opposite cognitive challenge modulatory patterns in the LIFC across the two  
616 tasks suggest that these sub-regions are recruited in differing ways. These showed a  
617 preference for the Naming task involving linguistic processing (and a sensitivity to cognitive  
618 challenge in that specific domain). At the same time, they showed what could be interpreted  
619 as the presence of a suppression-like mechanism in the non-linguistic Judgment task. Such an  
620 activation pattern has been exhibited by regions relatively disengaged from a specific ongoing

621 task (Merabet et al., 2007; Hairston et al., 2008; Linke et al., 2011; Farooqui & Manly, 2017;  
622 Farooqui et al., 2018). Consistent with this and the behavioural data, the LIFC BOLD reduction  
623 pattern observed during High-challenge conditions of the Judgment task was accompanied  
624 by increased activation elsewhere in the MDS (cf. Figure 5 and see below), as well as in  
625 sensory cortices (cf. Supplementary Figure S1C-D). This suggests that further cognitive  
626 resources were recruited for the Judgment task in different MDS brain regions as cognitive  
627 challenge increased (Duncan, 2010).

628 Notably, we did not identify any sub-region within the LIFC showing a domain-general  
629 modulatory effect. That is, behavioural performance based on cognitive challenge per se,  
630 irrespective of task, did not allow us to explain activity in the LIFC. However, it was possible  
631 to explain activity based on behavioural performance when considering Naming alone.

632 In other words, within the LIFC for the Naming task there was consistency between behaviour  
633 and BOLD response, whereas in the Judgment task no such consistency was observed.  
634 However, within the right inferior frontal cortex (opercular part; cf. Figure 4C and Table 3),  
635 we did observe a significant modulation of challenge (High- vs. Low) in the auditory domain,  
636 irrespective of task. This suggests different functioning rules in homologue inferior frontal  
637 regions across the two hemispheres (e.g., see Cai et al., 2013), the left domain-specific vs. the  
638 right domain-general.

639 This functional discrepancy between the hemispheres may help clarify recovery of left-  
640 hemisphere damaged patients with aphasia. In these patients, lesions to the LIFC (or its  
641 functional disconnection) are highly likely to impair linguistic processing in domain-specific  
642 nodes. Several sources of evidence report that perilesional brain tissue in the LIFC is key for a  
643 significant, long-lasting speech recovery (Fridriksson, 2010; Fridriksson et al., 2012). Our  
644 present results highlight that the LIFC is not a homogenous functional unit and refine that  
645 prediction such that not all perilesional areas within the LIFC might play an equivalent role in  
646 speech recovery (i.e., depending on whether perilesional areas include language-specific sub-  
647 regions, or not). This might also explain why some patients with more focal left frontal  
648 damage are more likely to have domain-specific spoken language deficits (such as anomia)  
649 whereas others with more extensive damage show both language and domain-general  
650 deficits.



651 Furthermore, our data suggest that the right inferior frontal cortex may well play a facilitatory  
652 role in spoken language production, especially when supported by auditory cues (Blasi et al.,  
653 2002; Crinion & Price, 2005; Nardo et al., 2017). Indeed, its domain-general functional  
654 characteristics – as indicated in the present study (cf. the contrast **High-challenge>Low-**  
655 **challenge** in the Auditory modality) – suggest that this substrate might be sufficiently flexible  
656 to support a certain degree of linguistic re-learning (Raboyeau et al., 2008; Richter et al.,  
657 2008), although it probably cannot become as efficient as a specialised, hard-wired substrate  
658 such as the LIFC (cf. Hartwigsen & Siebner, 2013; Riès et al., 2016).

659 Our imaging results also showed that – as predicted by the MDS theory (Duncan & Owen,  
660 2000; Duncan, 2010, 2013) – High-challenge (i.e., increased cognitive demand irrespective of  
661 task) was associated with increased activation in several MDS nodes (cf. Figure 5 and  
662 Supplementary Table ST1), as well as in visual cortices (Supplementary Figure S1C-D and Table  
663 3). Mirroring our behavioural data, in all MDS nodes a greater modulatory effect was  
664 observed in the Naming task, (cf. Task x Auditory challenge and Task x Visual challenge, where  
665 the difference between High- and Low-challenge is larger in the Naming than in the Judgment  
666 task). This shows how sensitive the MDS is to cognitive challenge when processing linguistic  
667 material, nicely complementing previous works with non-linguistic material (Fedorenko et al.,  
668 2013).

669

#### 670 *Effect of tDCS*

671 tDCS has been applied to different brain areas to investigate neuromodulatory effects on  
672 various cognitive tasks (Chen et al., 2014; Conson et al., 2015; Pripfl & Lamm, 2015; Brezis et  
673 al., 2016; Zmigrod et al., 2016; Payne & Tsakiris, 2017). To our knowledge, the present study  
674 is the first to utilise anodal tDCS delivered to the LIFC to directly test its contribution to  
675 domain-specific (language) vs. domain-general (cognitively demanding) functioning.

676 Behaviourally, we found no main effect of anodal tDCS. Instead, we found a significant  
677 interaction between Anodal tDCS, cognitive demand (low visual challenge) and task (Naming),  
678 with a significant behavioural facilitation, i.e. reduced RTs compared to Sham. That is, if it was  
679 easy to Name – during Sham – it was even easier and more efficient (as indexed by faster RTs)  
680 when paired with Anodal tDCS delivered to the LIFC. This behavioural difference in tDCS

681 outcomes between two visually different conditions may be related to the novelty of naming  
682 our visually challenging (ambiguous) stimuli. Previous research suggests that Anodal tDCS  
683 may induce facilitation when the task is well-trained or familiar, but such facilitation is not  
684 present during the performance of a novel task (Dockery et al., 2009), or is in accordance with  
685 the level of executive control demands (Hussey et al., 2015).

686 Within the targeted LIFC, a significant neural effect of tDCS was observed for the same  
687 interaction with Task and Visual challenge, with a larger decrease in BOLD response for the  
688 Naming task during Low-challenge conditions (cf. plot in Figure 6). This effect replicates  
689 previous findings from our group (Holland et al., 2011), where concurrent Anodal tDCS paired  
690 with a naming task resulted in reduced BOLD response in the same LIFC cluster (triangular  
691 part). tDCS itself cannot induce an over-threshold depolarisation of neurons directly, rather it  
692 induces firing in neurons that are already near-threshold, which means that neurons  
693 unaffected by the task are less likely to discharge (Miniussi & Ruzzoli, 2013). The combination  
694 of Anodal tDCS with naming is similar to the co-activation of a specific LIFC network,  
695 modulating ongoing long-term potentiation-like changes that outlast the stimulation, leading  
696 to consolidation of naming changes and thereby facilitating processing (Miniussi et al., 2013).  
697 This is evocative of Hebbian-like plasticity mechanisms. In our (unfamiliar) Judgment task the  
698 context is different: the variability of the task to engage the LIFC likely meant variability of the  
699 synaptic input function, implying that there was more background noise in the system and  
700 little consolidation of the neural networks. In this case, Anodal tDCS would increase both the  
701 signal and the noise in the system, both being close to threshold. In this sense, Anodal tDCS  
702 delivered to the LIFC would not consistently perturb the neural system supporting the  
703 judgment processes. In sum, tDCS requires ongoing learning in order to promote or modify  
704 plasticity to prime the task-engaged system and produce corresponding specific effects in the  
705 cognitive system, hence the observed interaction effects in the LIFC with task and cognitive  
706 challenge.

707 Notably, only in the neuroimaging data did we find a significant main effect of Anodal tDCS.  
708 This was not in the targeted LIFC, but remotely in the left visual cortex, where Anodal tDCS  
709 resulted in decreased BOLD response across both tasks irrespective of cognitive demand.  
710 Similar remote effects in non-invasive brain stimulation have been reported previously in the  
711 motor and language domain (Ward et al., 2010; Antal et al., 2011; Hartwigsen et al., 2017;

712 Fiori et al., 2018). A proposed mechanism of Anodal tDCS is the reduction of the amount of  
713 excitatory input required to produce a given response in a task-related (i.e., state-dependent)  
714 way (Polania et al., 2018) via modification of synaptic thresholds (i.e., by depolarising neurons  
715 close to the firing threshold; see Nitsche & Paulus, 2000, 2001). Increased excitability is  
716 associated with reduced BOLD response (i.e., less synaptic input to elicit a given output; cf.  
717 Antal et al., 2011; Holland et al., 2011; Fiori et al., 2018). Hence, we interpret this tDCS result  
718 in terms of a ‘neural priming’ in the visual cortex. Complex behaviours like naming and making  
719 size judgment about objects recruit large-scale bilateral neural systems, and visual processing  
720 of the stimuli is the key input to both networks. Therefore, Anodal tDCS is likely to modulate  
721 task-related connectivity of regions distant to the stimulation site, as well as task-related  
722 areas beneath the electrodes (Boros et al., 2008; Romero Lauro et al., 2014; Vecchio et al.,  
723 2018). This implies that the net behavioural effects we observed with Anodal tDCS for both  
724 tasks are likely based on a remodelling of the whole task-engaged networks; i.e., complex  
725 distributed network interactions rather than being caused by changes of a single left frontal  
726 region.

727

## 728 **CONCLUSIONS**

729 Our behavioural, neuroimaging and neuromodulation study indicates a more nuanced picture  
730 of domain-specificity vs. domain-generality in the LIFC functioning than previous studies,  
731 which have tended to argue for either domain-specific or domain-general aspects of spoken  
732 language processing, but not both. Importantly, by factoring out variations in task  
733 performance by matching tasks and stimuli characteristics when measuring speech responses  
734 (RTs), it allowed meaningful comparisons across domains (e.g., Y/N vs. Naming). In particular,  
735 the use of a cognitive challenge framework (easy vs. hard) allowed uncertainty in speech  
736 responses to be taken into account when examining response demands across domains. First,  
737 our neuroimaging data revealed sub-regions within the LIFC (particularly ventral opercular  
738 and triangular parts) that were more strongly activated in a domain-specific manner by the  
739 Naming task (language) than the Judgement task. Second, no sub-region within the LIFC was  
740 modulated in a domain-general manner by cognitive challenge *per se* (i.e., irrespective of the  
741 task at hand). Rather, three different sub-regions within the LIFC (opercular, triangular, and  
742 orbital parts) showed a sensitivity to challenge modulation selectively during the Naming task,

743 but not during Judgment. This observed change in magnitude of activation across tasks  
744 suggests that there may exist a gradient in which some speech tasks (such as Naming) are  
745 more likely to rely on a specific LIFC circuitry for language processing than others (such as  
746 making Yes/No decisions). Third, anodal tDCS targeting the LIFC delivered concurrently with  
747 both tasks showed a further modulation and consolidation of this domain-specific neural  
748 pattern resulting in behavioural changes (RTs).

749 Taken together, our results highlight the role of specific sub-regions within the LIFC in spoken  
750 language production. Within the LIFC we observed a functionally specific neural pattern  
751 qualitatively different from all other MDS nodes (with the exception of a small sub-region  
752 within the left pre-supplementary motor area; cf. Hertrich et al., 2016), i.e. preferentially  
753 related to linguistic processing (Fedorenko et al., 2012, 2013). How the functionally specific  
754 sub-network within the LIFC interacts with large-scale MDS (cf. Hsu et al., 2017) remains to  
755 be resolved. Future studies might profitably make use of effective connectivity analyses to  
756 help clarify the dynamic relationship of the different sub-regions of the LIFC with one another,  
757 as well as with the other MDS nodes (Hagoort, 2014; Holland et al., 2016). Observing how  
758 these interactions occur may help in identifying how to better support spoken language  
759 performance across individuals with language disorders, not just aphasia.

760 Our results also prepare the ground for possible clinical implications. It has been shown that,  
761 following a behavioural anomia treatment, aphasic patients exhibit a significant, robust and  
762 long-lasting improvement in speech production that is accompanied by neural priming effects  
763 (i.e., reduced BOLD response) in several MDS nodes, including the right homologue of the  
764 LIFC (Nardo et al., 2017). Notably, it is not clear whether such a treatment works by improving  
765 purely linguistic skills (i.e., domain-specific), or rather general cognitive resources. If adopted  
766 with aphasic patients, our protocol – including neurostimulation – might help to disentangle  
767 this issue, opening new perspectives to aphasia treatment and outcomes.

768

## 769 **ACKNOWLEDGMENTS**

770 We wish to thank Mr Henry Coley-Fisher and Dr Sheila Kerry for their help with stimuli  
771 creation. This study, including JC, DN, KP were funded by a Wellcome Trust Senior Research  
772 Fellowship in Clinical Science awarded to JC (106161/Z/14/Z). Scanning was conducted at the

34

773 Wellcome Trust Centre for Human Neuroimaging (WTCN). The WTCN is supported by core  
774 funding from the Wellcome Trust [203147/Z/16/Z].

775

776 **COMPETING INTERESTS**

777 None of the authors has financial or other conflicts of interest.

778

## 779 REFERENCES

- 780 Antal A, Polania R, Schmidt-Samoa C, Dechent P, Paulus W. Transcranial direct current  
781 stimulation over the primary motor cortex during fMRI. *Neuroimage*, 2011;55:590-596.
- 782 Bartley JE, Boeving ER, Riedel MC, Bottenhorn KL, Salo T, Eickhoff SB, Brewe E, Sutherland MT,  
783 Laird AR. Meta-analytic evidence for a core problem solving network across multiple  
784 representational domains. *Neurosci Biobehav Rev*. 2018;92:318-337.
- 785 Blank I, Kanwisher N, Fedorenko E. A functional dissociation between language and multiple-  
786 demand systems revealed in patterns of BOLD signal fluctuations. *J Neurophysiol*.  
787 2014;112(5):1105-18.
- 788 Blasi V, Young AC, Tansy AP, Petersen SE, Snyder AZ, Corbetta M. Word retrieval learning  
789 modulates right frontal cortex in patients with left frontal damage. *Neuron*. 2002;36(1):159-  
790 70.
- 791 Boros K, Poreisz C, Münchau A, Paulus W, Nitsche MA. Premotor transcranial direct current  
792 stimulation (tDCS) affects primary motor excitability in humans. *Eur J Neurosci*. 2008  
793 Mar;27(5):1292-300.
- 794 Brezis N, Bronfman ZZ, Jacoby N, Lavidor M, Usher M. Transcranial Direct Current Stimulation  
795 over the Parietal Cortex Improves Approximate Numerical Averaging. *J Cogn Neurosci*.  
796 2016;28(11):1700-1713.
- 797 Cai Q, Van der Haegen L, Brysbaert M. Complementary hemispheric specialization for  
798 language production and visuospatial attention. *Proc Natl Acad Sci U S A*. 2013;110(4):E322-  
799 30.
- 800 Camilleri JA, Müller VI, Fox P, Laird AR, Hoffstaedter F, Kalenscher T, Eickhoff SB. Definition  
801 and characterization of an extended multiple-demand network. *Neuroimage*. 2018;165:138-  
802 147.
- 803 Chen JC, Hämmerer D, Strigaro G, Liou LM, Tsai CH, Rothwell JC, Edwards MJ. Domain-specific  
804 suppression of auditory mismatch negativity with transcranial direct current stimulation. *Clin*  
805 *Neurophysiol*. 2014;125(3):585-92.
- 806 Conson M, Errico D, Mazarella E, Giordano M, Grossi D, Trojano L. Transcranial Electrical  
807 Stimulation over Dorsolateral Prefrontal Cortex Modulates Processing of Social Cognitive and  
808 Affective Information. *PLoS One*. 2015;10(5):e0126448.
- 809 Crinion J, Price CJ. Right anterior superior temporal activation predicts auditory sentence  
810 comprehension following aphasic stroke. *Brain*. 2005;128(Pt 12):2858-71.
- 811 Dapretto M, Bookheimer SY. Form and content: dissociating syntax and semantics in sentence  
812 comprehension. *Neuron*. 1999 Oct;24(2):427-32.
- 813 Darkow R, Martin A, Würtz A, Flöel A, Meinzer M. Transcranial direct current stimulation  
814 effects on neural processing in post-stroke aphasia. *Hum Brain Mapp*. 2017;38(3):1518-1531.
- 815 Dockery CA, Hueckel-Weng R, Birbaumer N, Plewnia C. Enhancement of planning ability by  
816 transcranial direct current stimulation. *J Neurosci*. 2009;29(22):7271-7.
- 817 Duncan J, Owen AM. Common regions of the human frontal lobe recruited by diverse  
818 cognitive demands. *Trends Neurosci*. 2000 23(10):475-83.

- 819 Duncan J. The multiple-demand (MD) system of the primate brain: mental programs for  
820 intelligent behaviour. *Trends Cogn Sci*. 2010 14(4):172-9.
- 821 Duncan J. The structure of cognition: attentional episodes in mind and brain. *Neuron*. 2013  
822 80(1):35-50.
- 823 Farooqui AA, Duncan J, Manly T. Hierarchical Cognition causes Task Related Deactivations but  
824 not just in Default Mode Regions. *bioRxiv* 2018 (in press)
- 825 Fedorenko E, Thompson-Schill SL. Reworking the language network. *Trends Cogn Sci*.  
826 2014;18(3):120-6.
- 827 Fedorenko E, Hsieh PJ, Nieto-Castañón A, Whitfield-Gabrieli S, Kanwisher N. New method for  
828 fMRI investigations of language: defining ROIs functionally in individual subjects. *J*  
829 *Neurophysiol*. 2010 ;104(2):1177-94.
- 830 Fedorenko E, Behr MK, Kanwisher N. Functional specificity for high-level linguistic processing  
831 in the human brain. *Proc Natl Acad Sci U S A*. 2011;108(39):16428-33.
- 832 Fedorenko E, Duncan J, Kanwisher N. Language-selective and domain-general regions lie side  
833 by side within Broca's area. *Curr Biol*. 2012 22(21):2059-62.
- 834 Fedorenko E, Duncan J, Kanwisher N. Broad domain generality in focal regions of frontal and  
835 parietal cortex. *Proc Natl Acad Sci U S A*. 2013;110(41):16616-21.
- 836 Fiori V, Kunz L, Kuhnke P, Marangolo P, Hartwigsen G. Transcranial direct current stimulation  
837 (tDCS) facilitates verb learning by altering effective connectivity in the healthy brain.  
838 *Neuroimage*. 2018;181:550-559.
- 839 Fridriksson J. Preservation and modulation of specific left hemisphere regions is vital for  
840 treated recovery from anomia in stroke. *J Neurosci*. 2010;30(35):11558-64.
- 841 Fridriksson J, Richardson JD, Fillmore P, Cai B. Left hemisphere plasticity and aphasia recovery.  
842 *Neuroimage*. 2012 Apr 2;60(2):854-63.
- 843 Geranmayeh F, Wise RJ, Mehta A, Leech R. Overlapping networks engaged during spoken  
844 language production and its cognitive control. *J Neurosci*. 2014;34(26):8728-40.
- 845 Hagoort P. Nodes and networks in the neural architecture for language: Broca's region and  
846 beyond. *Curr Opin Neurobiol*. 2014;28:136-41.
- 847 Hartwigsen G, Bzdok D, Klein M, Wawrzyniak M, Stockert A, Wrede K, Classen J, Saur D. Rapid  
848 short-term reorganization in the language network. *Elife* 2017;6:e25964.
- 849 Hartwigsen G, Siebner HR. Novel methods to study aphasia recovery after stroke. *Front*  
850 *Neurol Neurosci*. 2013;32:101-11.
- 851 Hertrich I, Dietrich S, Ackermann H. The role of the supplementary motor area for speech and  
852 language processing. *Neurosci Biobehav Rev*. 2016;68:602-610.
- 853 Holland R, Leff AP, Josephs O, Galea JM, Desikan M, Price CJ, Rothwell JC, Crinion J. Speech  
854 facilitation by left inferior frontal cortex stimulation. *Curr Biol*. 2011;21(16):1403-7.
- 855 Holland R, Leff AP, Penny WD, Rothwell JC, Crinion J. Modulation of frontal effective  
856 connectivity during speech. *Neuroimage*. 2016;140:126-33.
- 857 Hsu NS, Jaeggi SM, Novick JM. A common neural hub resolves syntactic and non-syntactic  
858 conflict through cooperation with task-specific networks. *Brain Lang*. 2017;166:63-77.



- 859 January D, Trueswell JC, Thompson-Schill SL. Co-localization of stroop and syntactic ambiguity  
860 resolution in Broca's area: implications for the neural basis of sentence processing. *J Cogn*  
861 *Neurosci.* 2009;21(12):2434-44.
- 862 Miniussi C, Ruzzoli M. Transcranial stimulation and cognition. *Handb Clin Neurol.*  
863 2013;116:739-50.
- 864 Miniussi C, Harris JA, Ruzzoli M. Modelling non-invasive brain stimulation in cognitive  
865 neuroscience. *Neurosci Biobehav Rev.* 2013;37(8):1702-12.
- 866 Nardo D, Holland R, Leff AP, Price CJ, Crinion JT. Less is more: neural mechanisms underlying  
867 anomia treatment in chronic aphasic patients. *Brain.* 2017 140(11):3039-3054.
- 868 Nitsche MA, Paulus W. Excitability changes induced in the human motor cortex by weak  
869 transcranial direct current stimulation. *J. Physiol* 2000;527:633-639.
- 870 Nitsche MA, Paulus W. Sustained excitability elevations induced by transcranial DC motor  
871 cortex stimulation in humans. *Neurology,* 2001;57(10):1899-1901.
- 872 Noppeney U, Phillips J, Price C. The neural areas that control the retrieval and selection of  
873 semantics. *Neuropsychologia.* 2004;42(9):1269-80.
- 874 Novick JM, Kan IP, Trueswell JC, Thompson-Schill SL. A case for conflict across multiple  
875 domains: memory and language impairments following damage to ventrolateral prefrontal  
876 cortex. *Cogn Neuropsychol.* 2009;26(6):527-67.
- 877 Payne S, Tsakiris M. Anodal transcranial direct current stimulation of right temporoparietal  
878 area inhibits self-recognition. *Cogn Affect Behav Neurosci.* 2017;17(1):1-8.
- 879 Petkov CI, Marslen-Wilson WD. Editorial overview: The evolution of language as a  
880 neurobiological system. *Curr Opin Behav Sci.* 2018;21:v-xii.
- 881 Polanía R, Nitsche MA, Ruff CC. Studying and modifying brain function with non-invasive brain  
882 stimulation. *Nat Neurosci.* 2018;21(2):174-187.
- 883 Price CJ. A review and synthesis of the first 20 years of PET and fMRI studies of heard speech,  
884 spoken language and reading. *Neuroimage.* 2012 62(2):816-47.
- 885 Pripfl J, Lamm C. Focused transcranial direct current stimulation (tDCS) over the dorsolateral  
886 prefrontal cortex modulates specific domains of self-regulation. *Neurosci Res.* 2015  
887 Feb;91:41-7.
- 888 Raboyeau G, De Boissezon X, Marie N, Balduyck S, Puel M, Bézy C, Démonet JF, Cardebat D.  
889 Right hemisphere activation in recovery from aphasia: lesion effect or function recruitment?  
890 *Neurology.* 2008 Jan 22;70(4):290-8.
- 891 Richter M, Miltner WH, Straube T. Association between therapy outcome and right-  
892 hemispheric activation in chronic aphasia. *Brain.* 2008;131(Pt 5):1391-401.
- 893 Riès SK, Dronkers NF, Knight RT. Choosing words: left hemisphere, right hemisphere, or both?  
894 Perspective on the lateralization of word retrieval. *Ann N Y Acad Sci.* 2016;1369(1):111-31.
- 895 Rodd JM, Johnsrude IS, Davis MH. The role of domain-general frontal systems in language  
896 comprehension: evidence from dual-task interference and semantic ambiguity. *Brain Lang.*  
897 2010;115(3):182-8.

- 898 Rodd JM, Vitello S, Woollams AM, Adank P. Localising semantic and syntactic processing in  
899 spoken and written language comprehension: an Activation Likelihood Estimation meta-  
900 analysis. *Brain Lang.* 2015;141:89-102.
- 901 Romero Lauro LJ, Rosanova M, Mattavelli G, Convento S, Pisoni A, Opitz A, Bolognini N, Vallar  
902 G. TDCS increases cortical excitability: direct evidence from TMS-EEG. *Cortex.* 2014;58:99-  
903 111.
- 904 Santi A, Grodzinsky Y. Working memory and syntax interact in Broca's area. *Neuroimage.*  
905 2007;37(1):8-17.
- 906 Snyder HR, Feigenson K, Thompson-Schill SL. Prefrontal cortical response to conflict during  
907 semantic and phonological tasks. *J Cogn Neurosci.* 2007;19(5):761-75.
- 908 Thompson-Schill SL, D'Esposito M, Aguirre GK, Farah MJ. Role of left inferior prefrontal cortex  
909 in retrieval of semantic knowledge: a reevaluation. *Proc Natl Acad Sci U S A.*  
910 1997;94(26):14792-7.
- 911 Tyler LK, Marslen-Wilson WD, Randall B, Wright P, Devereux BJ, Zhuang J, Papoutsis M,  
912 Stamatakis EA. Left inferior frontal cortex and syntax: function, structure and behaviour in  
913 patients with left hemisphere damage. *Brain.* 2011;134(Pt 2):415-31.
- 914 Tzourio-Mazoyer N, Landeau B, Papathanassiou D, Crivello F, Etard O, Delcroix N, Mazoyer B,  
915 Joliot M. Automated anatomical labeling of activations in SPM using a macroscopic  
916 anatomical parcellation of the MNI MRI single-subject brain. *Neuroimage.* 2002;15(1):273-89.
- 917 Vecchio F, Di Iorio R, Miraglia F, Granata G, Romanello R, Bramanti P, Rossini PM. Transcranial  
918 direct current stimulation generates a transient increase of small-world in brain connectivity:  
919 an EEG graph theoretical analysis. *Exp Brain Res.* 2018;236(4):1117-1127.
- 920 Vitello S, Warren JE, Devlin JT, Rodd JM. Roles of frontal and temporal regions in  
921 reinterpreting semantically ambiguous sentences. *Front Hum Neurosci.* 2014;8:530.
- 922 Ward NS, Bestmann S, Hartwigsen G, Weiss MM, Christensen LOD, Frackowiak RSJ, Rothwell  
923 JC, Siebner HR. Low-Frequency Transcranial Magnetic Stimulation over Left Dorsal Premotor  
924 Cortex Improves the Dynamic Control of Visuospatially Cued Actions. *J Neurosci*  
925 2010;30:9216–9223.
- 926 Woolgar A, Bor D, Duncan J. Global increase in task-related fronto-parietal activity after focal  
927 frontal lobe lesion. *J Cogn Neurosci.* 2013;25(9):1542-52.
- 928 Zmigrod S, Zmigrod L, Hommel B. Transcranial direct current stimulation (tDCS) over the  
929 right dorsolateral prefrontal cortex affects stimulus conflict but not response conflict.  
930 *Neuroscience.* 2016;322:320-5.
- 931

## 932 **SUPPLEMENTARY MATERIAL**

### 933 *Performance in the Naming task*

934 In the present study, our main behavioural measure was reaction times (RTs). RTs have been  
935 computed on all responses provided irrespective of performance. In the Naming task,  
936 performance was scored with reference to the target word to-be-named. In case the response  
937 provided was different from the target word, the type of response was categorised. Types of  
938 response and their occurrence throughout the experiment are reported in Supplementary  
939 Table ST2. Overall, we considered four types of response: 1) CORRECT; 2) RELATED; 3)  
940 INCORRECT; and 4) MISSING. CORRECT responses included: *target words* (e.g., “cat” for cat),  
941 *self-corrections* (“cow... sheep” for sheep), *multiple words* (“apple core” for core), and  
942 *phonemes plus target words* (“/sh/... box” for box). RELATED responses included: *super-/sub-*  
943 *ordinate categories* (“bird” for owl), *semantic errors* (“reindeer” for moose), *visual errors*  
944 (“snake” for lead), *synonyms* (“present” for gift). INCORRECT responses included: *neologisms*,  
945 *single phonemes without target words* (“/s/” for step), *wrong responses* (“dress” for ball).  
946 MISSING responses were those where no response was provided. In the Judgment task,  
947 performance could not be assessed in the same way, because there was no ‘target response’  
948 to compare the performance with.

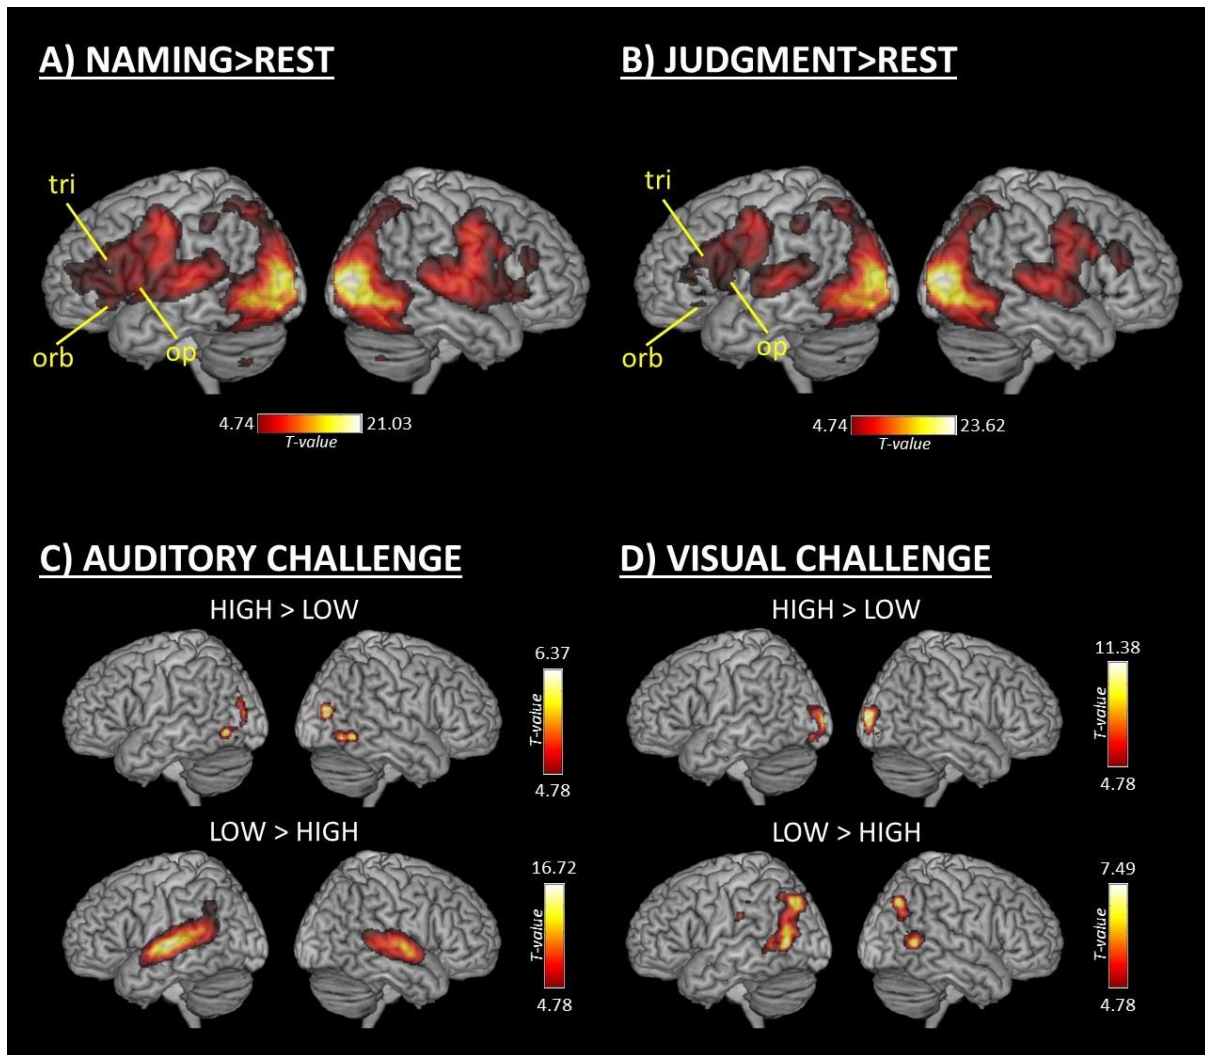

949

950 **Supplemental Figure S1.** A) Areas associated with performing the Naming task. B) Areas associated  
 951 with performing the Judgment task. C) Areas associated with Auditory challenge. D) Areas associated  
 952 with Visual challenge. Legend: op = opercular part of the LIFC; tri = triangular part of the LIFC; orb =  
 953 orbital part of the LIFC; LOW = Low-challenge; HIGH = High-challenge.

954

| Contrast                                  | <b>AUDITORY CHALLENGE HIGH&gt;LOW</b> |            |         |      |      |
|-------------------------------------------|---------------------------------------|------------|---------|------|------|
|                                           | Region                                | x y z      | p(unc)  | K    | T    |
| <i>L anterior insular cortex</i>          |                                       | -26 24 4   | < 0.001 | 433  | 4.41 |
| <i>R anterior insular cortex</i>          |                                       | 32 24 6    | < 0.001 | 1073 | 4.71 |
| <i>L premotor cortex</i>                  |                                       | -38 0 36   | < 0.001 | 94   | 3.40 |
| <i>R premotor cortex</i>                  |                                       | 38 6 30    | < 0.001 | 496  | 5.83 |
| <i>L dorsal anterior cingulate cortex</i> |                                       | -8 20 42   | < 0.001 | 535  | 4.18 |
| <i>R dorsal anterior cingulate cortex</i> |                                       | 10 20 36   | 0.003   | 535  | 2.79 |
| <i>L pre-supplementary motor area</i>     |                                       | -6 12 52   | < 0.001 | 535  | 4.27 |
| <i>R pre-supplementary motor area</i>     |                                       | 10 10 52   | < 0.001 | 535  | 5.05 |
| <i>L posterior parietal cortex</i>        |                                       | -26 -64 50 | < 0.001 | 5029 | 4.49 |

| <i>R posterior parietal cortex</i>        | 22 -60 44    | < 0.001                             | 5055     | 9.56     |
|-------------------------------------------|--------------|-------------------------------------|----------|----------|
| <b>Contrast</b>                           |              | <b>VISUAL CHALLENGE HIGH&gt;LOW</b> |          |          |
| <b>Region</b>                             | <b>x y z</b> | <b>p(unc)</b>                       | <b>K</b> | <b>T</b> |
| <i>L anterior insular cortex</i>          | -28 24 4     | < 0.001                             | 156      | 3.44     |
| <i>R anterior insular cortex</i>          | 30 24 -2     | < 0.001                             | 265      | 4.33     |
| <i>L premotor cortex</i>                  | -38 0 36     | 0.001                               | 37       | 3.08     |
| <i>R premotor cortex</i>                  | 36 2 36      | 0.003                               | 19       | 2.81     |
| <i>L dorsal anterior cingulate cortex</i> | -10 22 40    | 0.003                               | 25       | 2.77     |
| <i>R dorsal anterior cingulate cortex</i> | 10 22 40     | < 0.001                             | 361      | 3.63     |
| <i>L pre-supplementary motor area</i>     | -4 0 60      | 0.001                               | 361      | 3.21     |
| <i>R pre-supplementary motor area</i>     | 10 12 52     | < 0.001                             | 361      | 4.51     |
| <i>L posterior parietal cortex</i>        | -16 -64 48   | < 0.001                             | 263      | 4.45     |
| <i>R posterior parietal cortex</i>        | 20 -58 48    | < 0.001                             | 3026     | 4.99     |

956

957 **Supplementary Table ST1 - Cognitive challenge-related modulations in other MDS nodes.** Legend: R  
958 = right; L = left; x y z = MNI coordinates; K = cluster size; T = t-scores; p(unc) uncorrected p-values

959

960

| <b>VISUAL CHALLENGE</b>      | <b>tDCS</b> |             | <b>SHAM</b> |             | <b>REAL</b> |             |            |             | <b>mean</b> |
|------------------------------|-------------|-------------|-------------|-------------|-------------|-------------|------------|-------------|-------------|
|                              | <b>LOW</b>  | <b>HIGH</b> | <b>LOW</b>  | <b>HIGH</b> | <b>LOW</b>  | <b>HIGH</b> | <b>LOW</b> | <b>HIGH</b> |             |
| <b>AUDITORY CHALLENGE</b>    |             |             |             |             |             |             |            |             |             |
| <i>target words</i>          | 86.2        | 56.7        | 75.9        | 45.1        | 84.1        | 58.4        | 67.9       | 39.6        | 64          |
| <i>self-corrections</i>      | 0.2         | 1.2         | 0.4         | 0.8         | 0.3         | 1.0         | 0.3        | 0.7         | 1           |
| <i>multiple words</i>        | 0.4         | 1.1         | 0.2         | 0.8         | 0.5         | 1.4         | 0.2        | 1.6         | 1           |
| <i>phonemes plus targets</i> | 0.3         | 0.4         | 0.4         | 0.5         | 0.4         | 0.6         | 0.0        | 0.6         | 0           |
| <b>TOT CORRECT</b>           | 87.1        | 59.4        | 76.9        | 47.2        | 85.3        | 61.4        | 68.4       | 42.5        | 66          |
| <i>super-/sub-ordinates</i>  | 0.1         | 1.4         | 0.4         | 1.4         | 0.4         | 1.1         | 0.1        | 1.1         | 1           |
| <i>semantic errors</i>       | 5.0         | 21.1        | 6.2         | 20.6        | 6.1         | 20.3        | 9.2        | 21.9        | 14          |
| <i>visual errors</i>         | 3.3         | 8.9         | 3.3         | 12.4        | 2.9         | 9.3         | 5.9        | 13.8        | 7           |
| <i>synonyms</i>              | 0.1         | 1.4         | 0.1         | 1.1         | 0.2         | 0.8         | 0.0        | 0.6         | 1           |
| <b>TOT RELATED</b>           | 8.5         | 32.8        | 10.0        | 35.5        | 9.6         | 31.5        | 15.2       | 37.4        | 23          |
| <i>neologisms</i>            | 0.0         | 0.0         | 0.4         | 0.1         | 0.0         | 0.0         | 0.9        | 0.3         | 0           |
| <i>single phonemes</i>       | 0.1         | 0.4         | 0.5         | 0.8         | 0.4         | 0.4         | 1.1        | 0.4         | 1           |
| <i>wrong responses</i>       | 3.6         | 5.6         | 9.0         | 11.9        | 3.7         | 5.5         | 10.8       | 15.2        | 8           |
| <b>TOT INCORRECT</b>         | 3.7         | 6.0         | 9.9         | 12.8        | 4.1         | 5.9         | 12.8       | 15.9        | 9           |
| <b>MISSING</b>               | 0.7         | 1.9         | 3.2         | 4.7         | 1.0         | 1.3         | 3.6        | 4.2         | 3           |
| <b>TOT</b>                   | 100         | 100         | 100         | 100         | 100         | 100         | 100        | 100         |             |

961

962 **Supplementary Table ST2 - Types of response in the Naming task, and their occurrence (in %)**  
963 **throughout the experiment.**
